# Supplementary material for: [4+2] versus [2+2] Homodimerization in P(V) Derivatives of 2,4-Disubstituted Phospholes
Source: Hindawi journal article supplement (doi:10.1155/2019/2596405), 2019-04-01
Supplement: f1 [file 2596405.f1.pdf]

## **[4+2] versus [2+2] dimerisation in P(V) derivatives of 2,4-disubstituted phospholes**

Guillaume Bousrez,<sup>1</sup> Emmanuel Nicolas,<sup>2</sup> Agathe Martinez,<sup>1</sup> Sylviane Chevreux,<sup>1</sup> and Florian Jaroschik<sup>1</sup>

<sup>1</sup> Institut de Chimie Moléculaire de Reims, Université de Reims Champagne-Ardenne, BP 1039, 51687 Reims, France.

<sup>2</sup> NIMBE, CEA, CNRS, Université Paris-Saclay, CEA Saclay 91191 Gif-sur-Yvette cedex, France

Correspondence should be addressed to Florian Jaroschik;  
[florian.jaroschik@enscm.fr](mailto:florian.jaroschik@enscm.fr)

### Content

|                                         |     |
|-----------------------------------------|-----|
| I. NMR spectra                          | S2  |
| II. Crystallographic data for <b>5d</b> | S30 |
| III. Details on DFT calculations        | S31 |

# I. NMR spectra

## Dimer of 1-phenyl-2,4-bis(trimethylsilyl)-oxophosphole (3b)

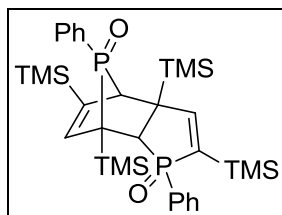

### $^1\text{H}$ (500 MHz, $\text{CDCl}_3$ )

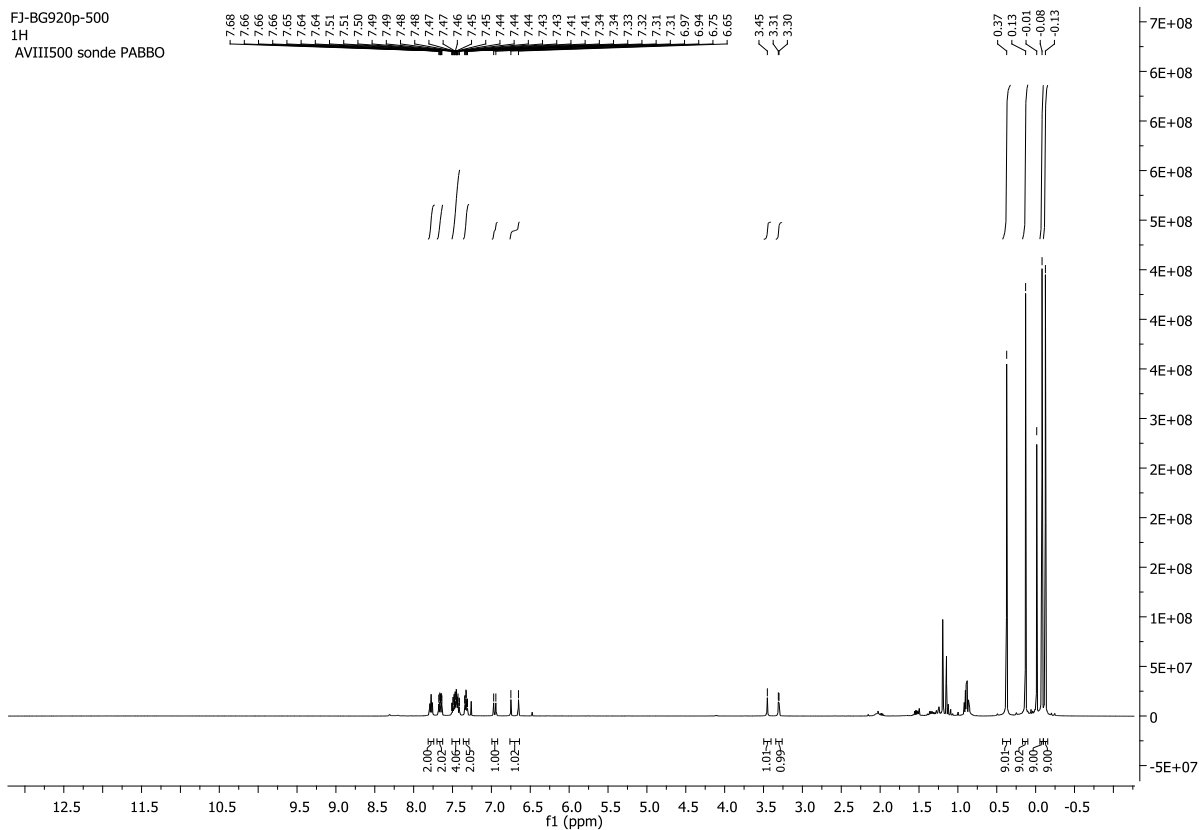

### $^{13}\text{C}$ (125 MHz, $\text{CDCl}_3$ )

FJ-BG920p-500  
1H  
AVIII500 sonde PABBO

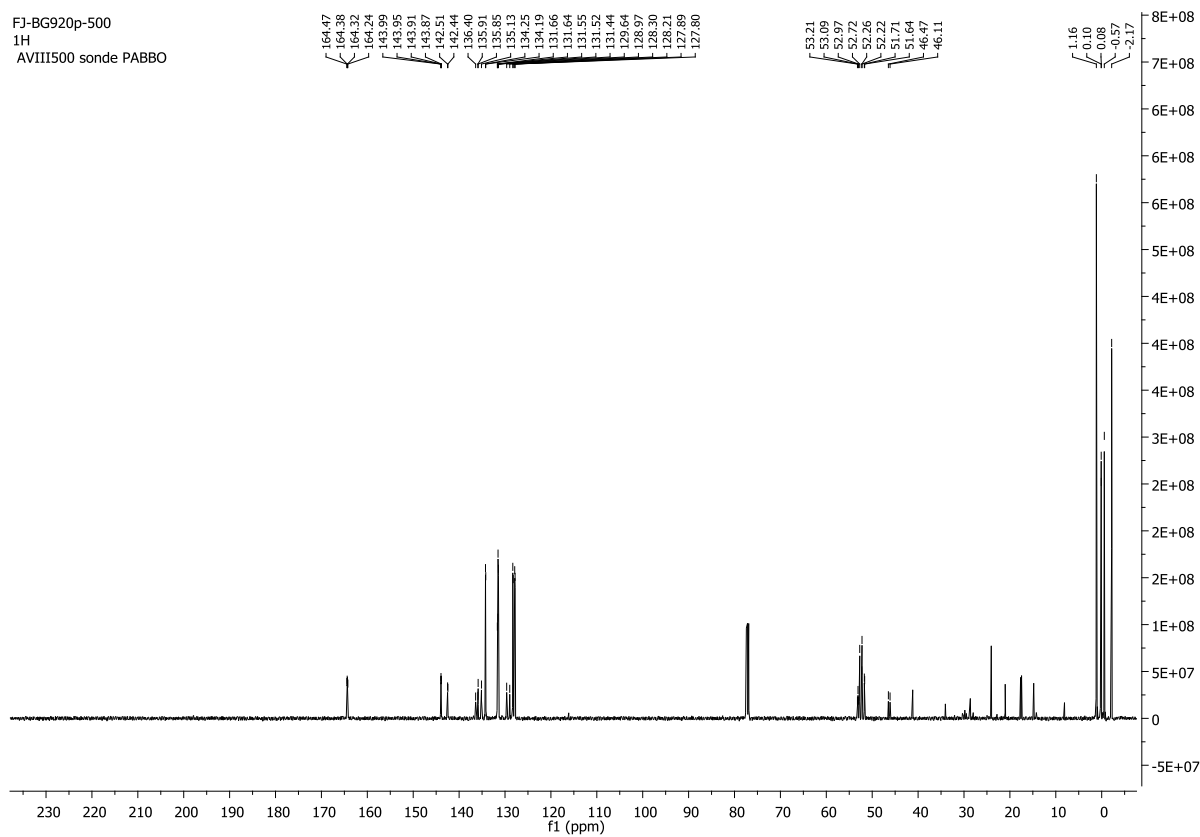

### $^{31}\text{P}$ (200 MHz, $\text{CDCl}_3$ )

FJ-BG920p-500  
1H  
AVIII500 sonde PABBO

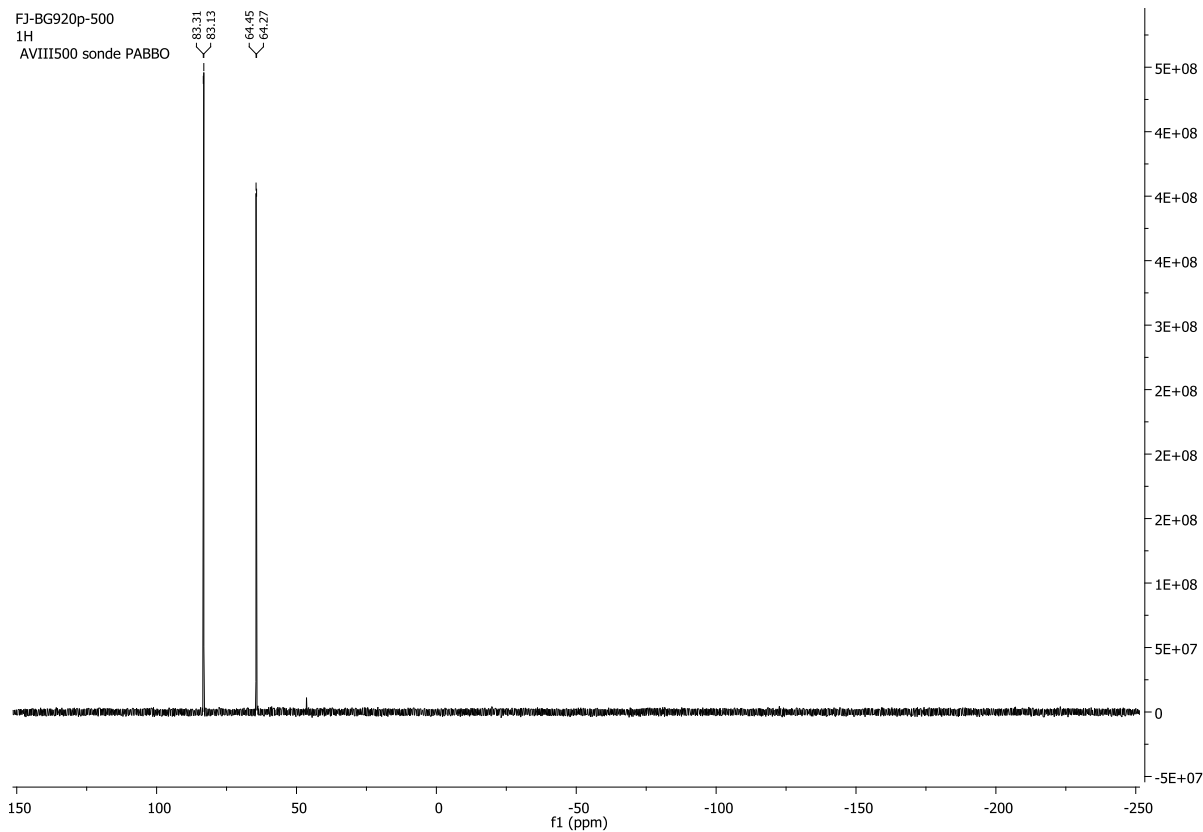

## $^{29}\text{Si}$ (100 MHz, $\text{CDCl}_3$ )

FJ-BG920p-500  
29Si sur FJ-AN27 dans  $\text{C}_6\text{D}_6$

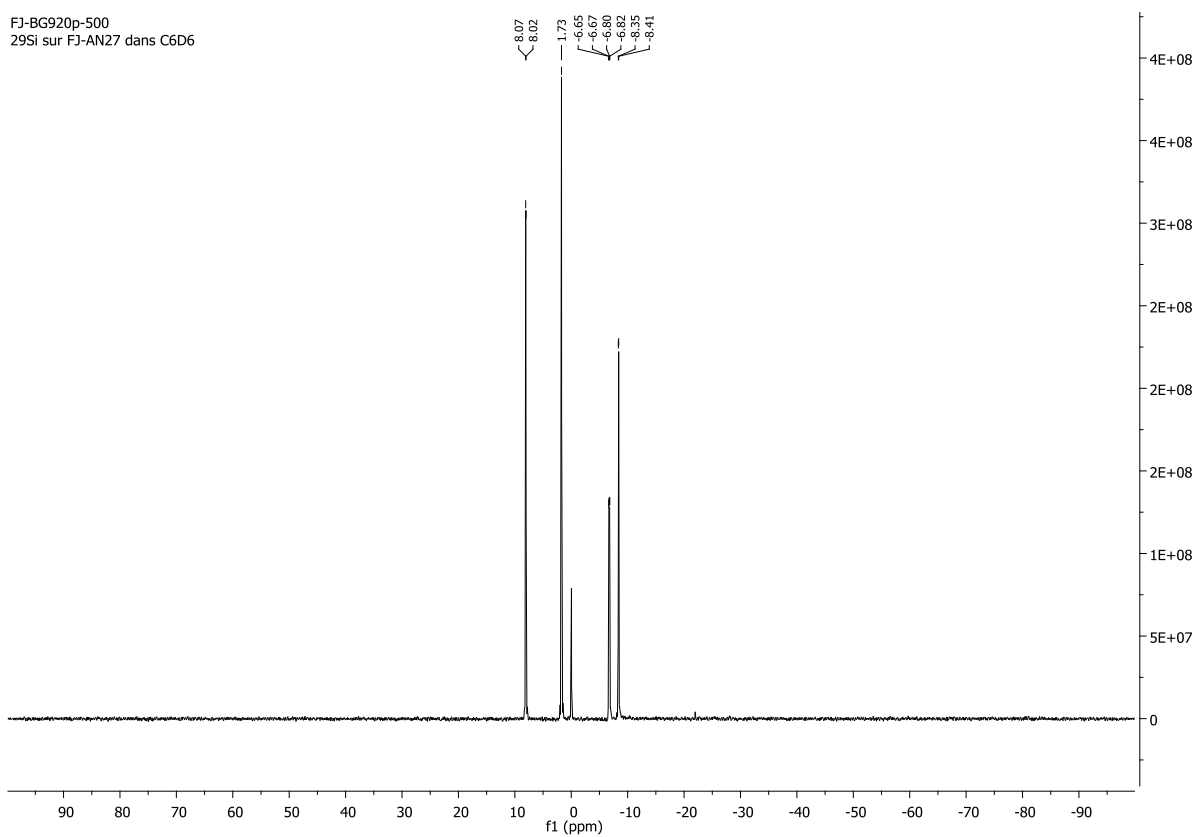

## 1,2,4-triphenyl-thiooxophosphole (4a)

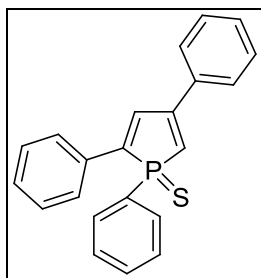

**<sup>1</sup>H (500 MHz, CDCl<sub>3</sub>)**

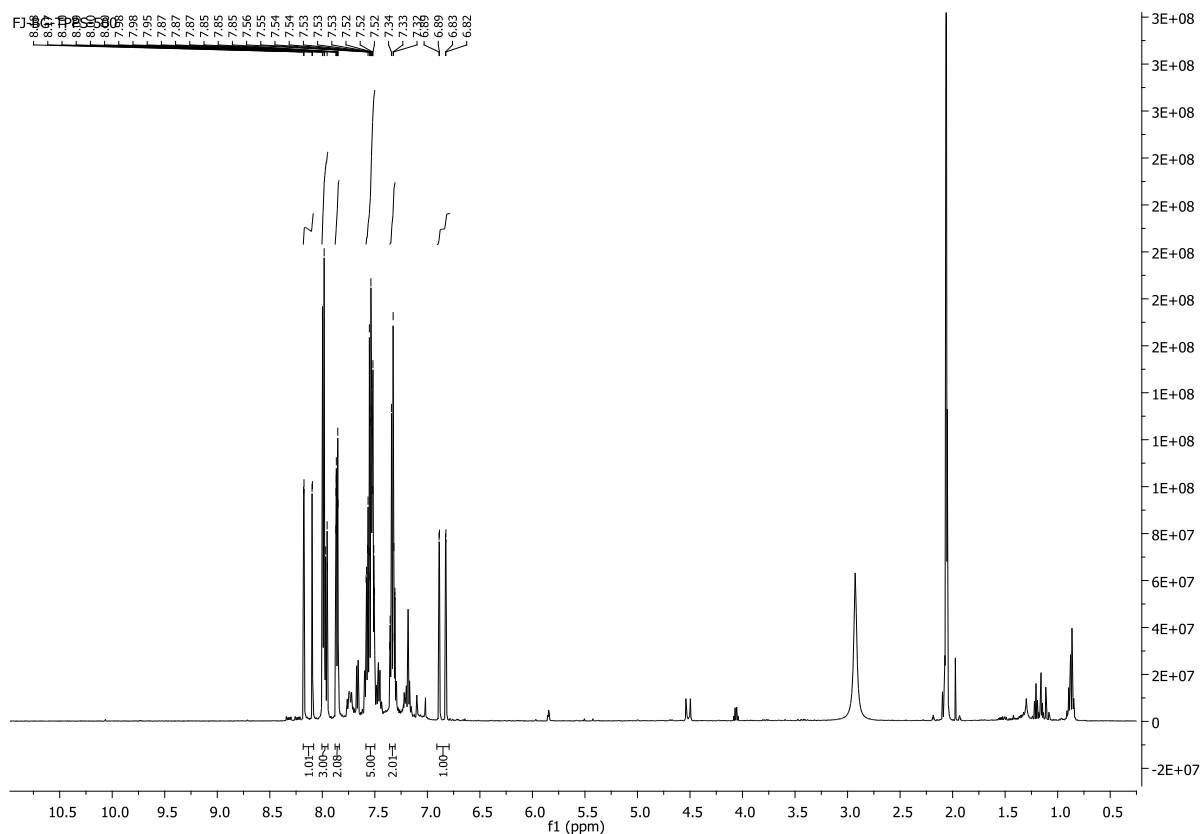

**<sup>13</sup>C (125 MHz, CDCl<sub>3</sub>)**

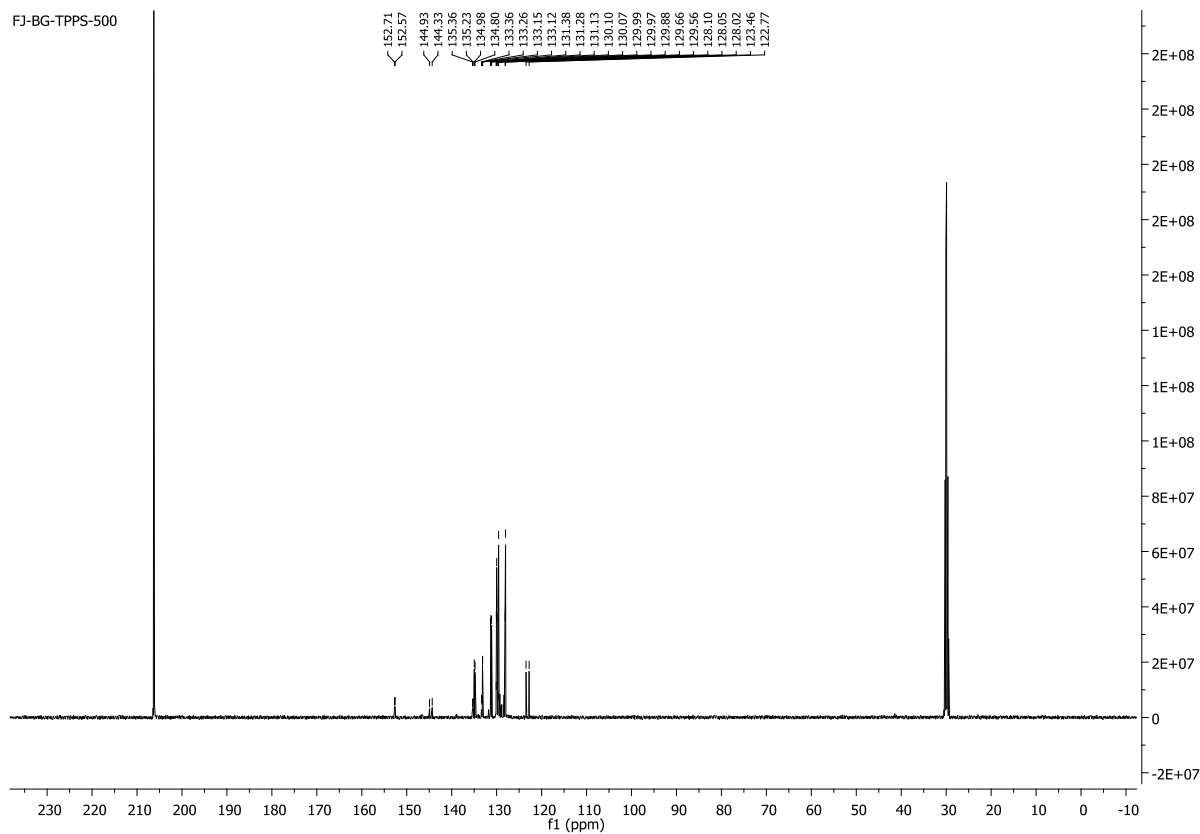

**$^{31}\text{P}$  (200 MHz,  $\text{CDCl}_3$ )**

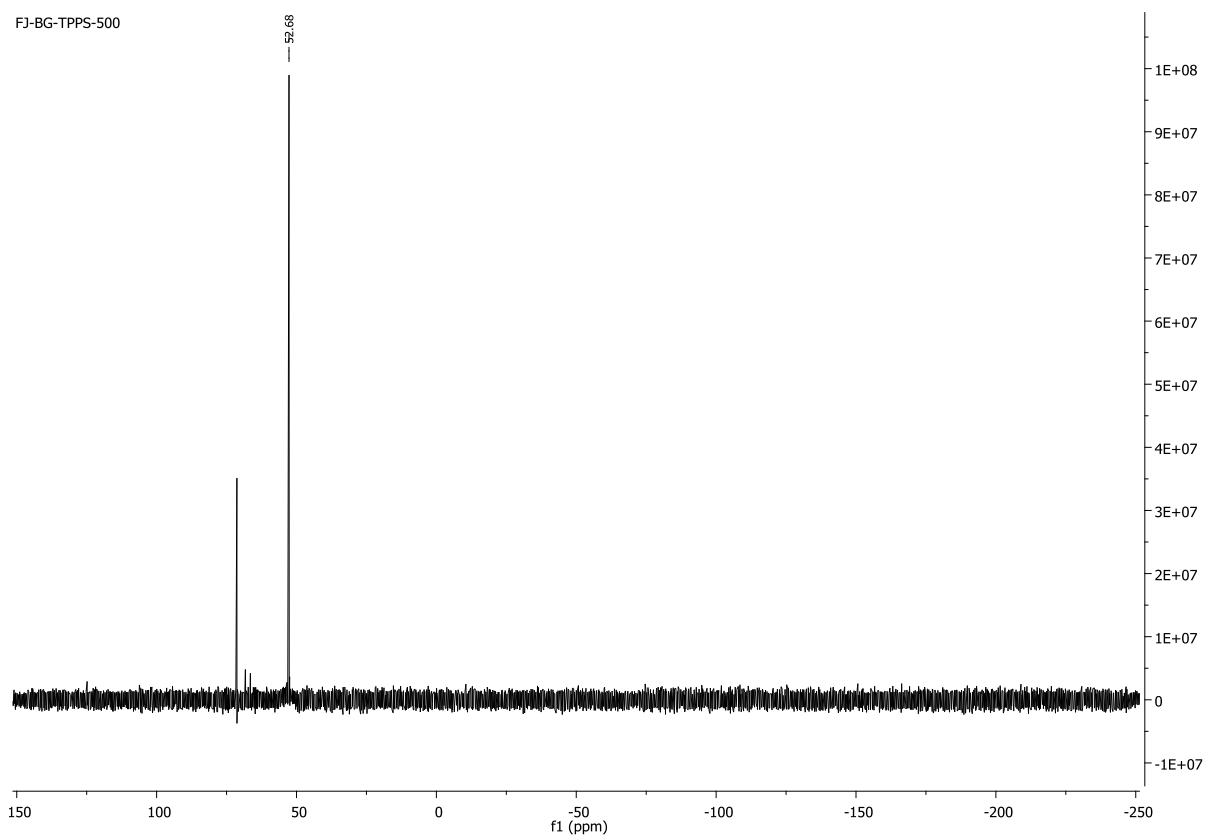

**1-phenyl-2,4-bis(trimethylsilyl)-thioxophosphole (4b)**

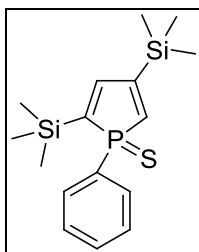

# <sup>1</sup>H (500 MHz, CDCl<sub>3</sub>)

FJ-BG631-500  
1H  
AVIII500 sonde PABBO

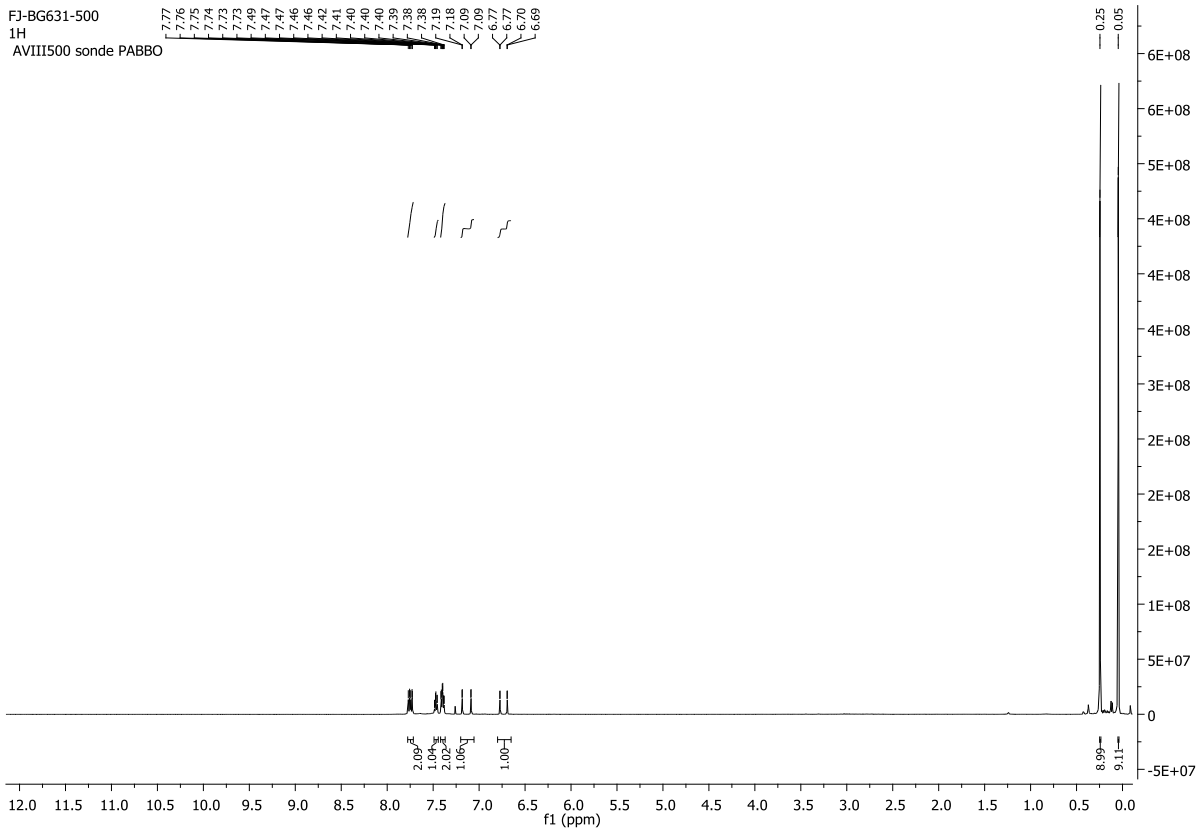

# <sup>13</sup>C (125 MHz, CDCl<sub>3</sub>)

FJ-BG631-500

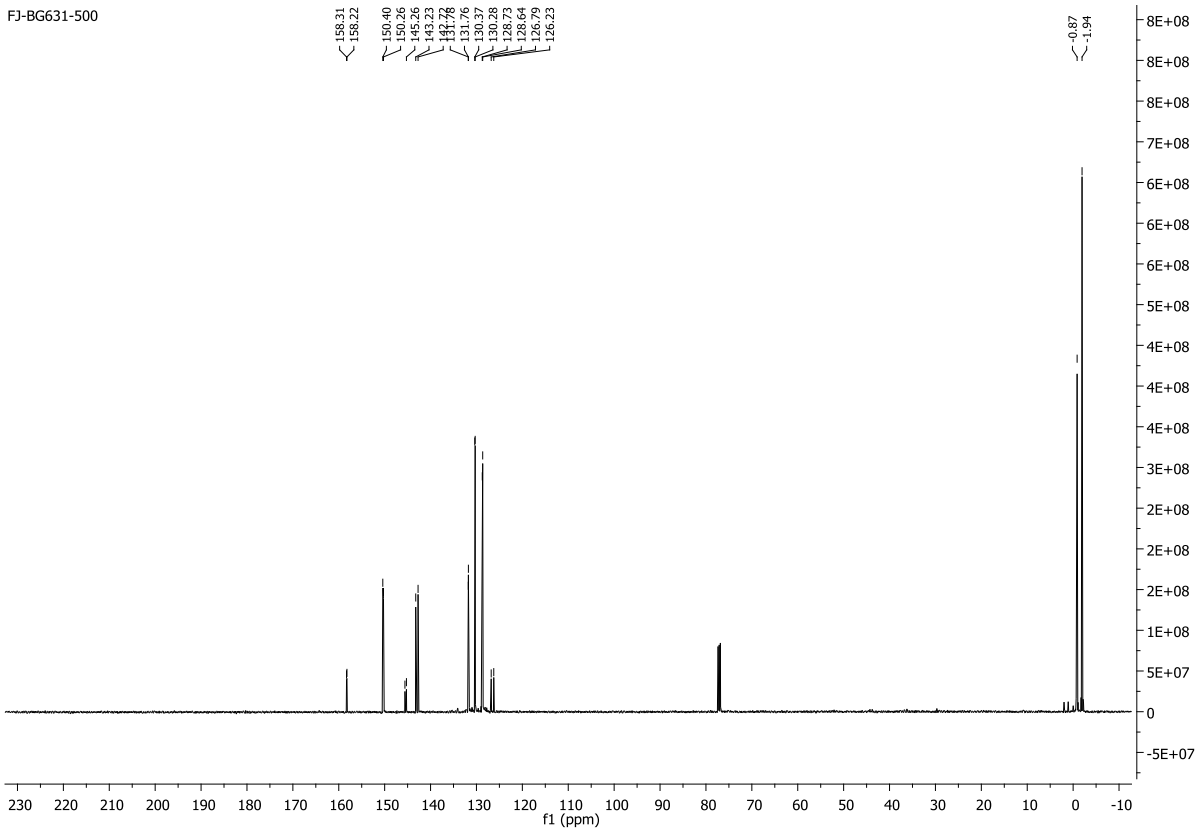

### $^{31}\text{P}$ (200 MHz, $\text{CDCl}_3$ )

FJ-BG631-500  
AVIII500 sonde PABBO

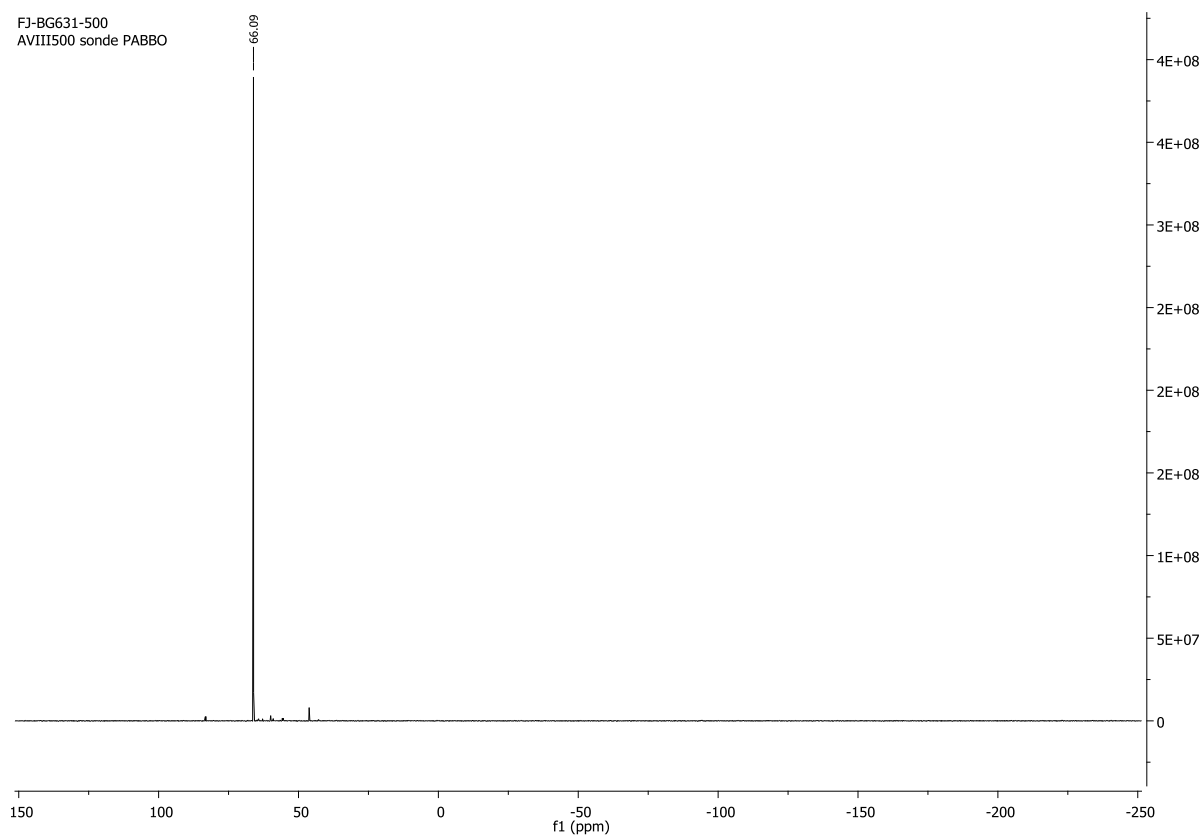

### $^{29}\text{Si}$ (100 MHz, $\text{CDCl}_3$ )

FJ-BG631-500  
 $^{29}\text{Si}$

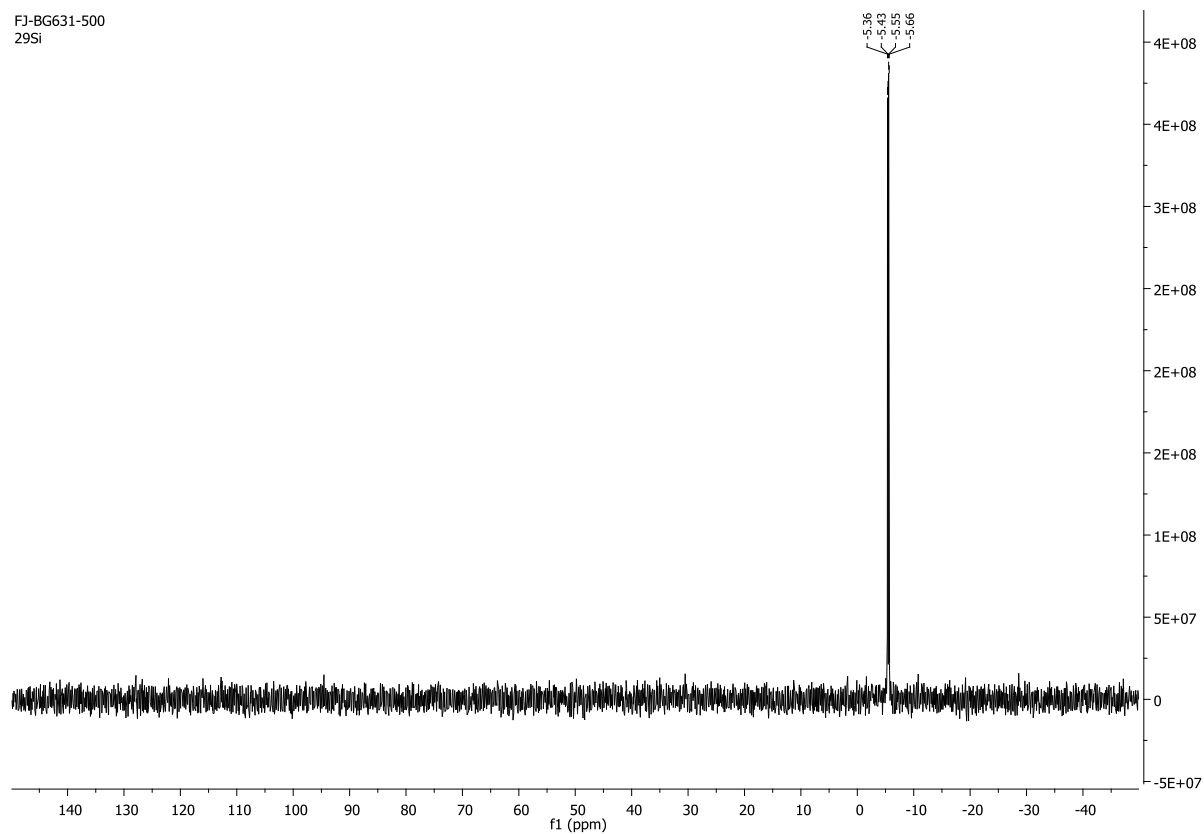



## 2,4-bis(tert-butyl)-1-phenyl-thioxophosphole (4c)

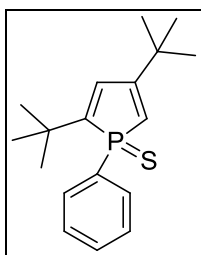

### $^1\text{H}$ (500 MHz, $\text{CDCl}_3$ )

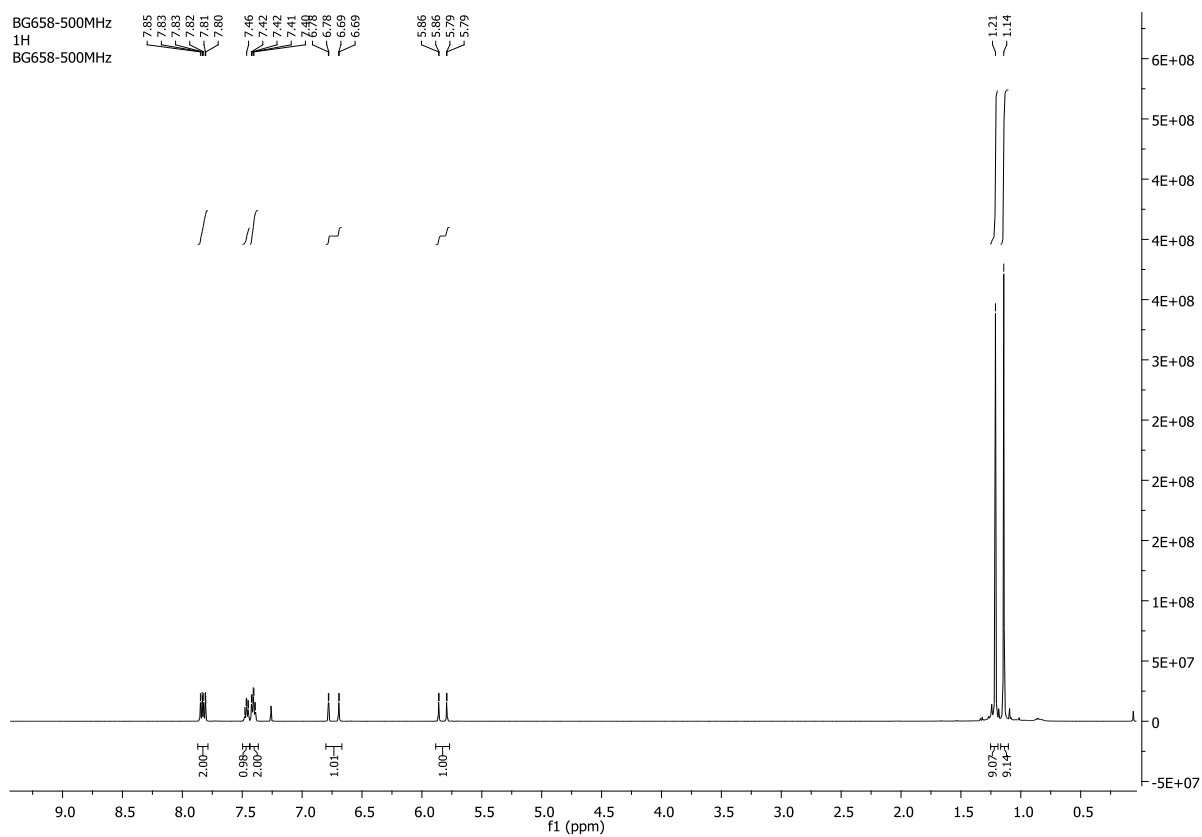

### <sup>13</sup>C (125 MHz, CDCl<sub>3</sub>)

BG658-500MHz  
13C decouple 1H  
BG658-500MHz

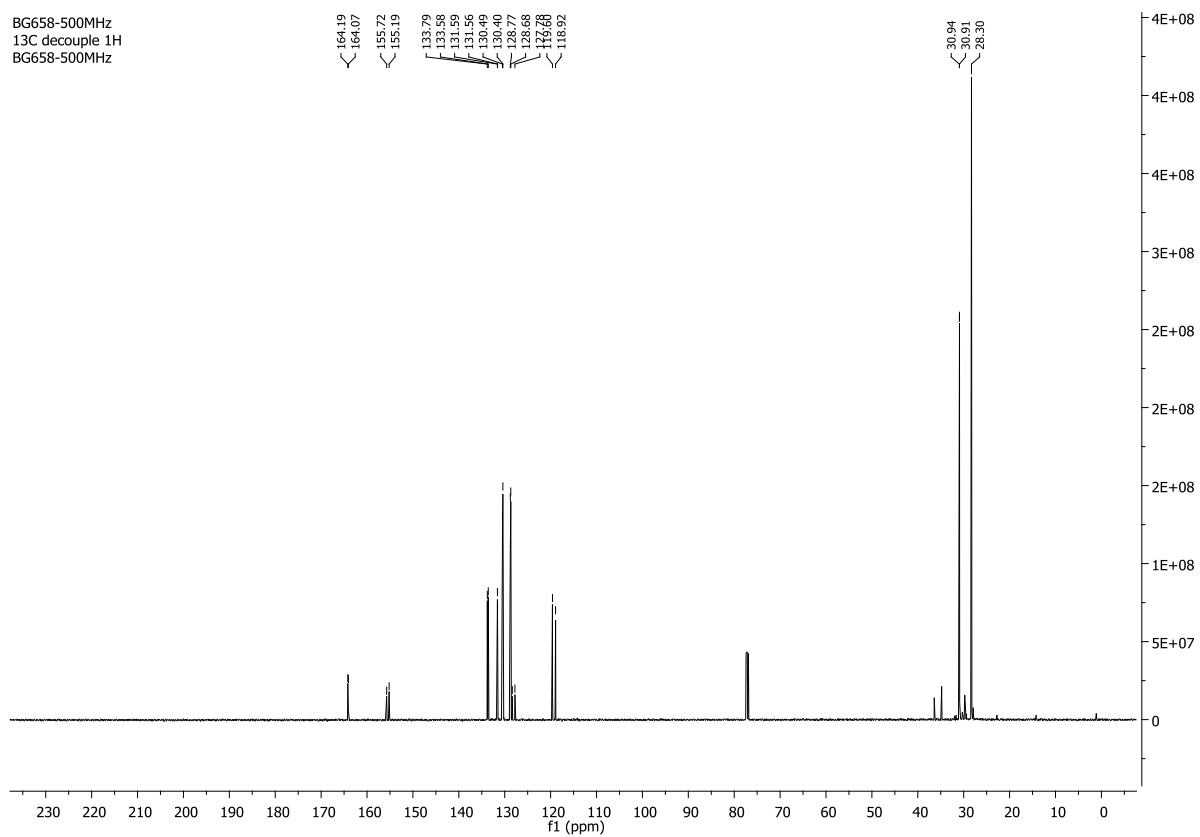

### <sup>31</sup>P (200 MHz, CDCl<sub>3</sub>)

BG658-500MHz  
31P decouple 1H  
BG658-500MHz

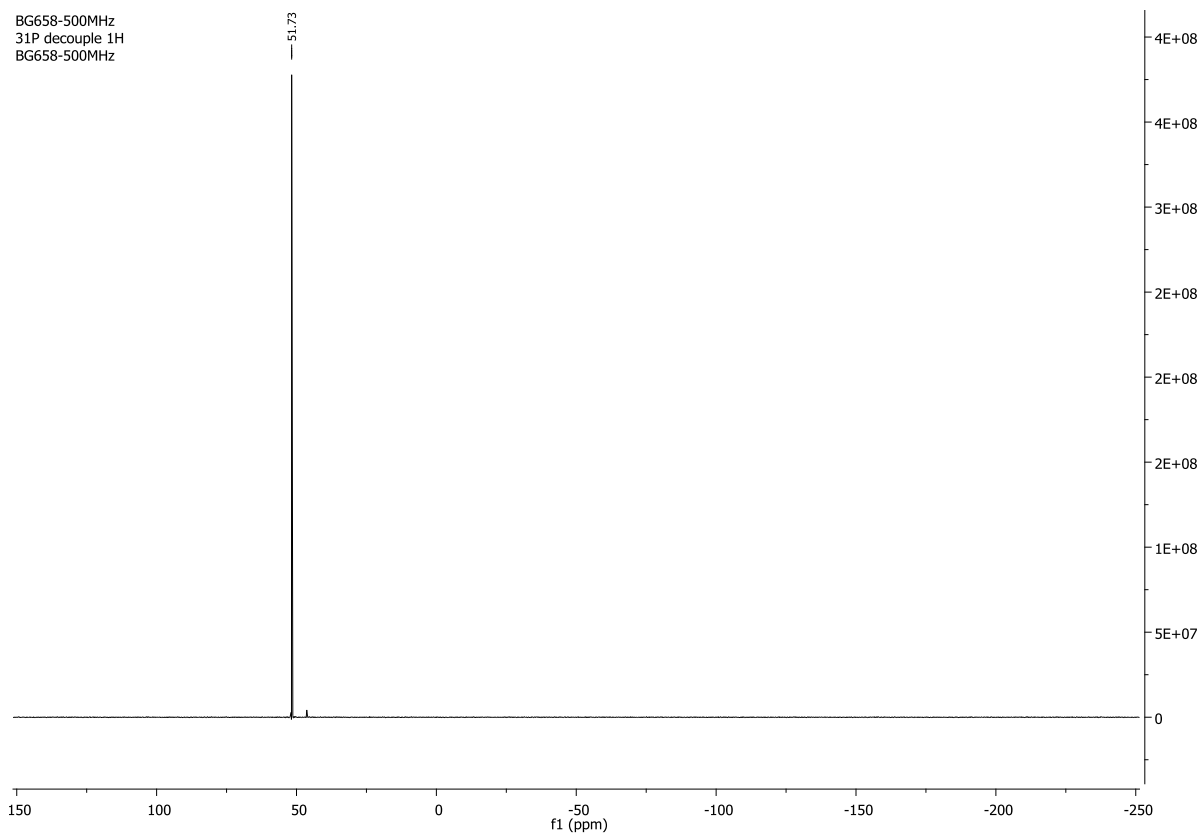

## 2,4-bis(4-fluorophenyl)-1-phenyl-thioxophosphole (4d)

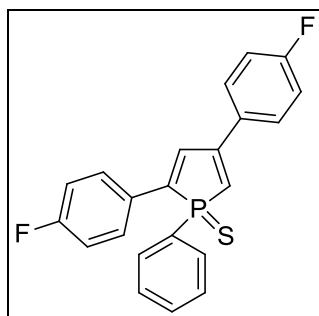

### $^1\text{H}$ (500 MHz, $\text{CDCl}_3$ )

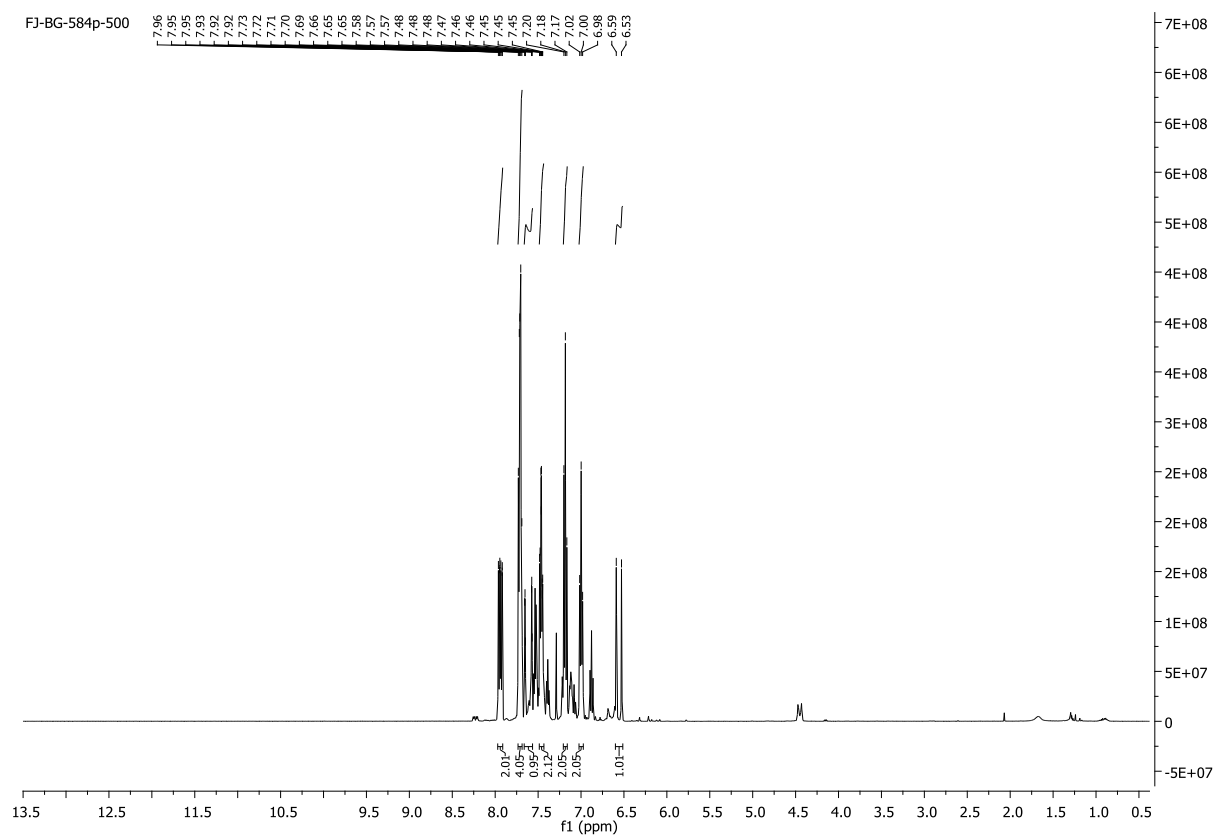

# <sup>13</sup>C (125 MHz, CDCl<sub>3</sub>)

FJ-BG-584p-500

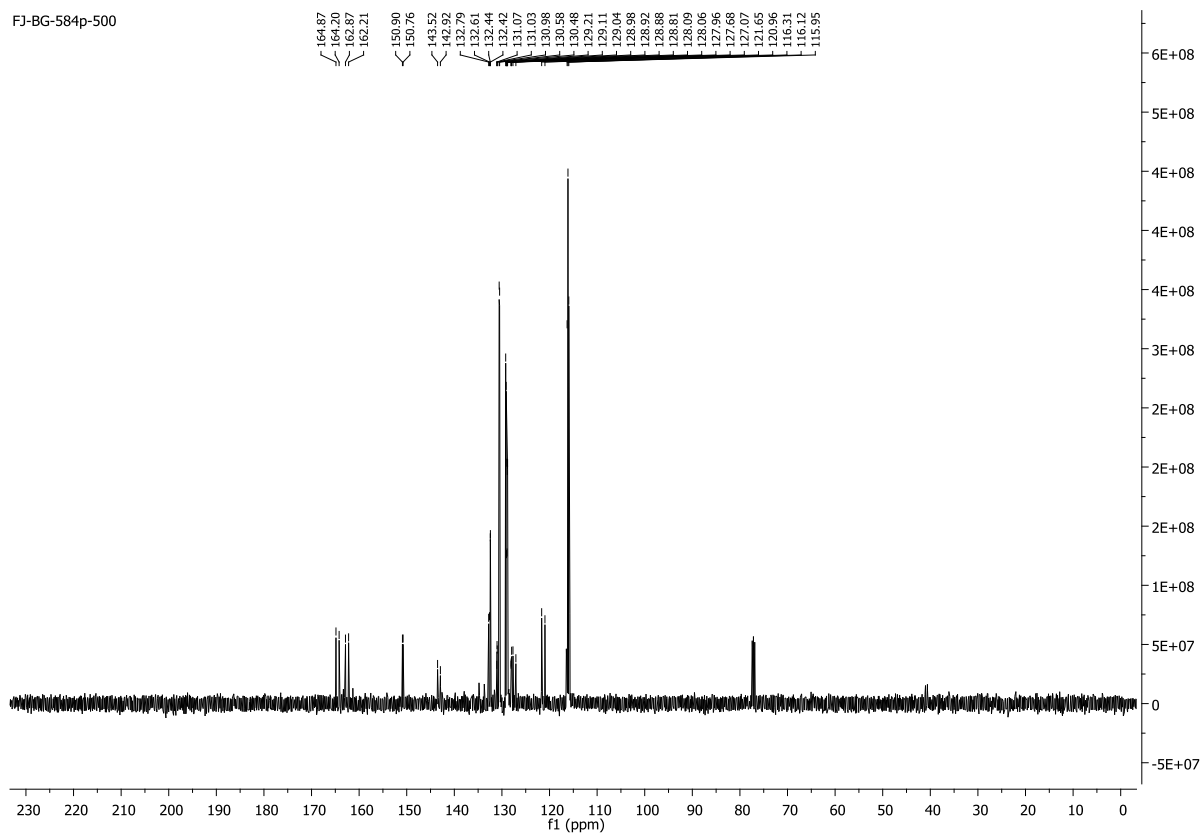

# <sup>19</sup>F (470 MHz, CDCl<sub>3</sub>)

FJ-BG-584p-500  
19F dec 1H

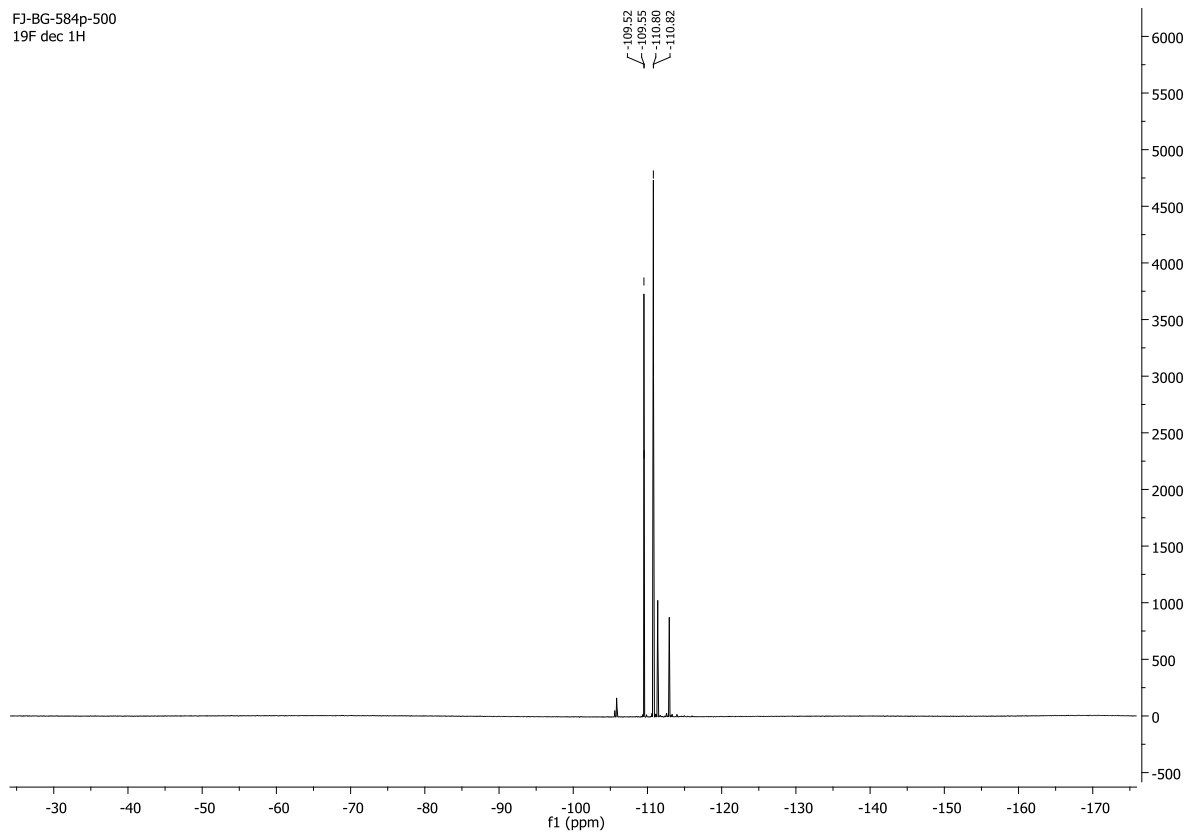

**$^{31}\text{P}$  (200 MHz,  $\text{CDCl}_3$ )**

FJ-BG-584p-500  
dans  $\text{CDCl}_3$   
 $^{31}\text{P}$

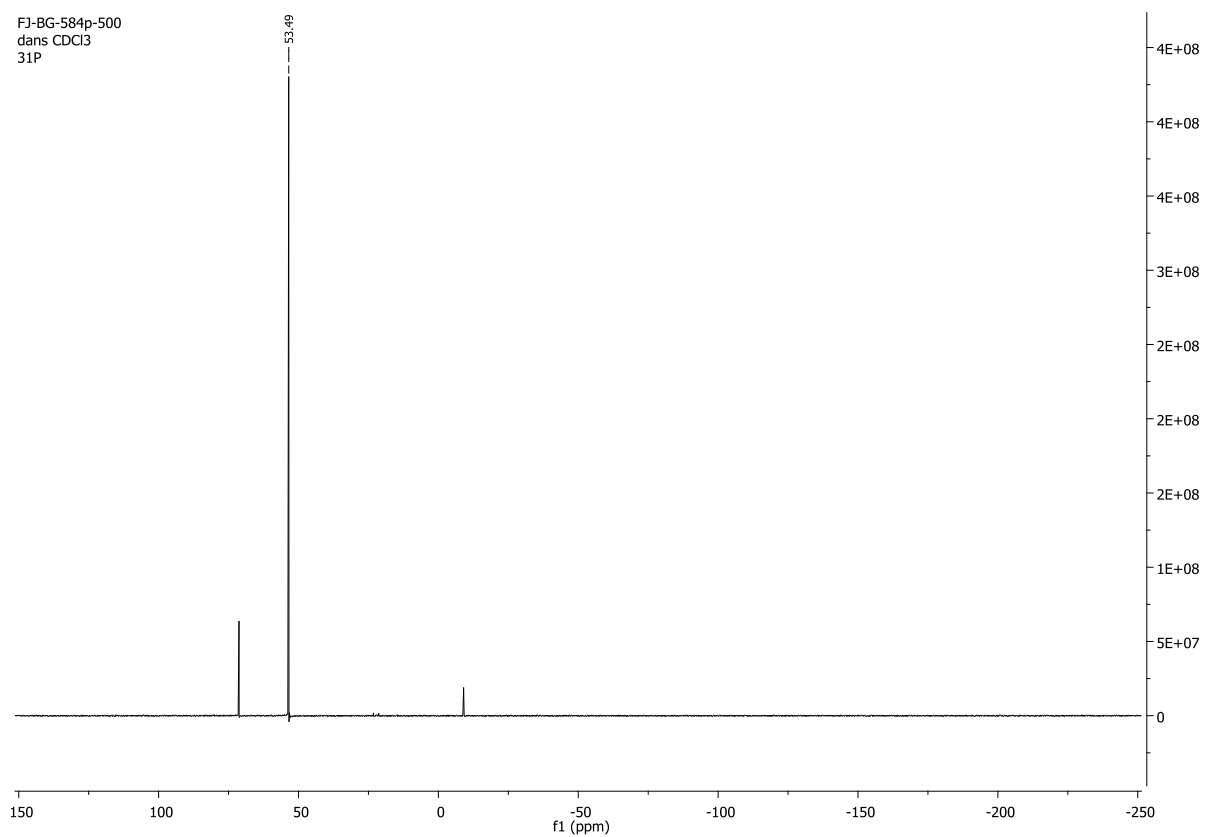

**Dimer of 1,2,4-triphenyl-thiooxophosphole (5a)**

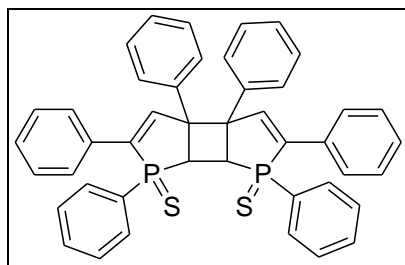

# <sup>1</sup>H (600 MHz, CDCl<sub>3</sub>)

FJ-BG854ppp-600  
CPTCI AVIII 600MHz

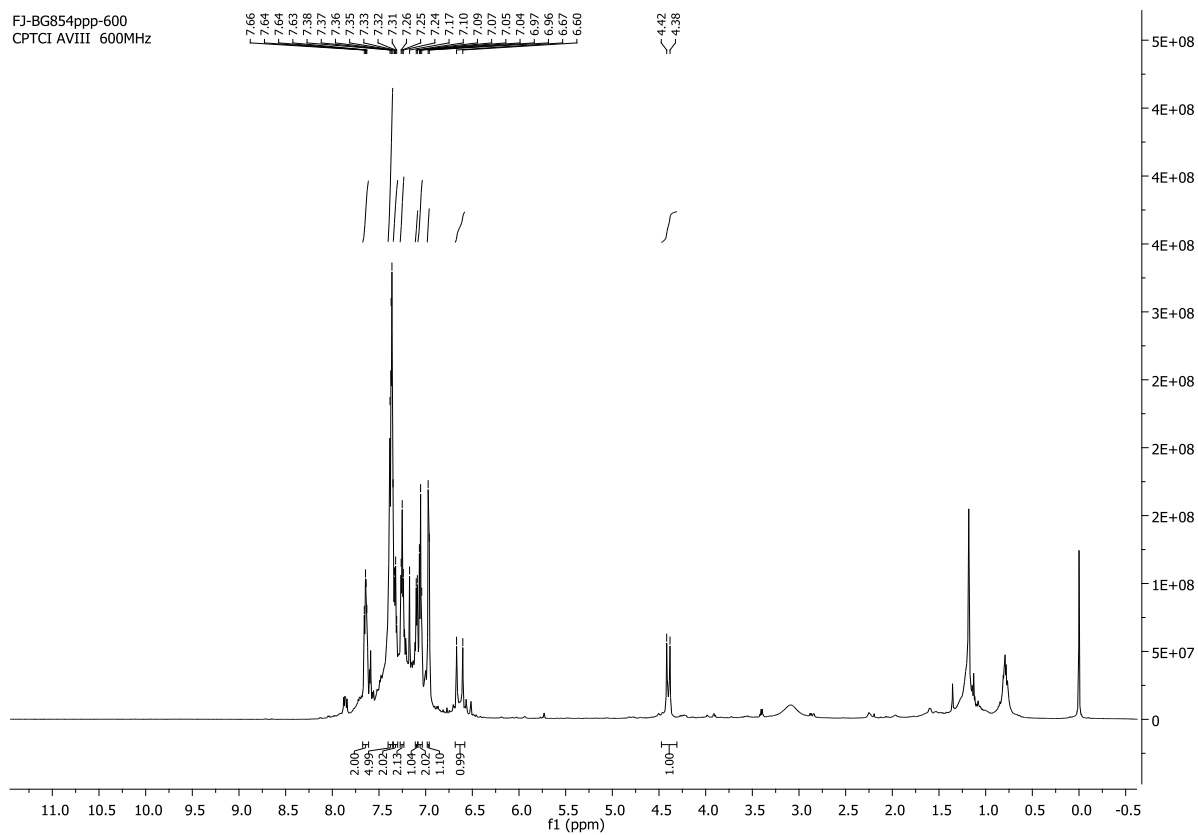

# <sup>13</sup>C (150 MHz, CDCl<sub>3</sub>)

FJ-BG854ppp-600  
CPTCI AVIII 600MHz

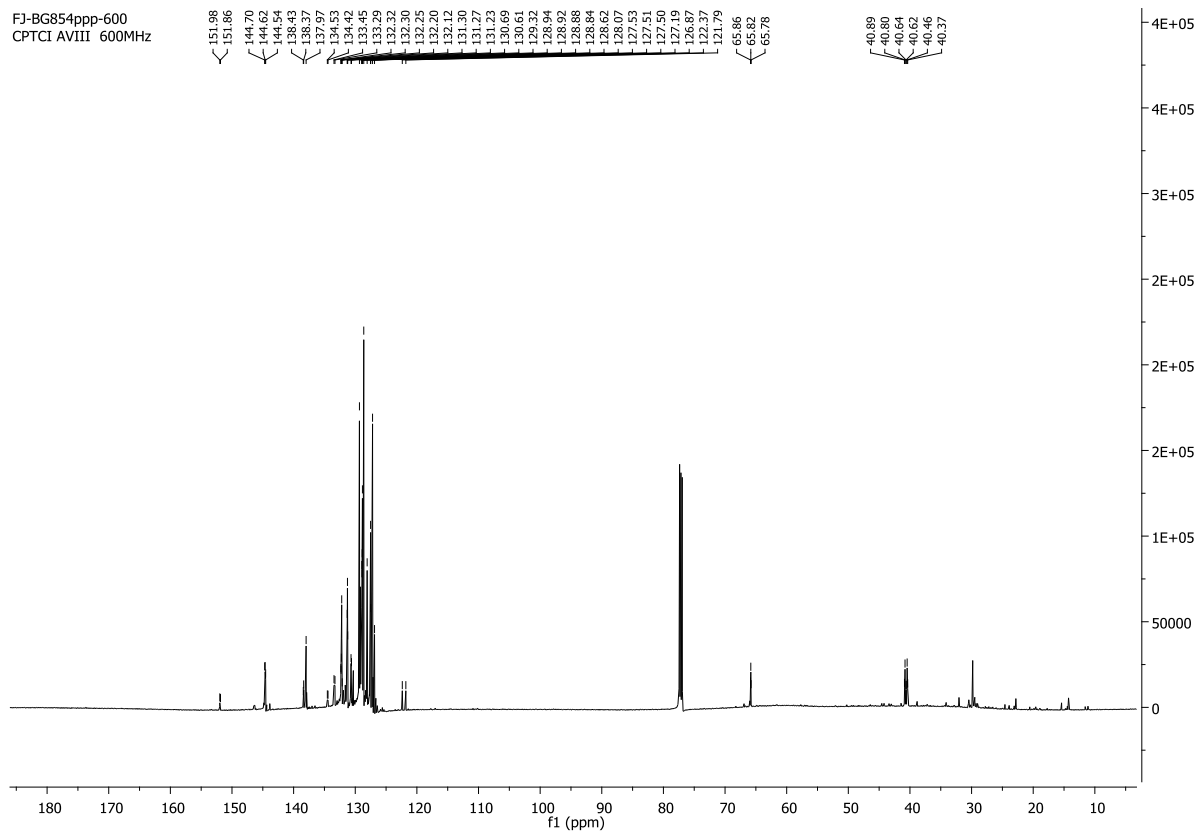

**$^{31}\text{P}$  (200 MHz,  $\text{CDCl}_3$ )**

FJ-BG854PPP-500  
31P dec 1H sur FJ-BG854PPP dans  $\text{CDCl}_3$   
AVIII500 sonde PABBO

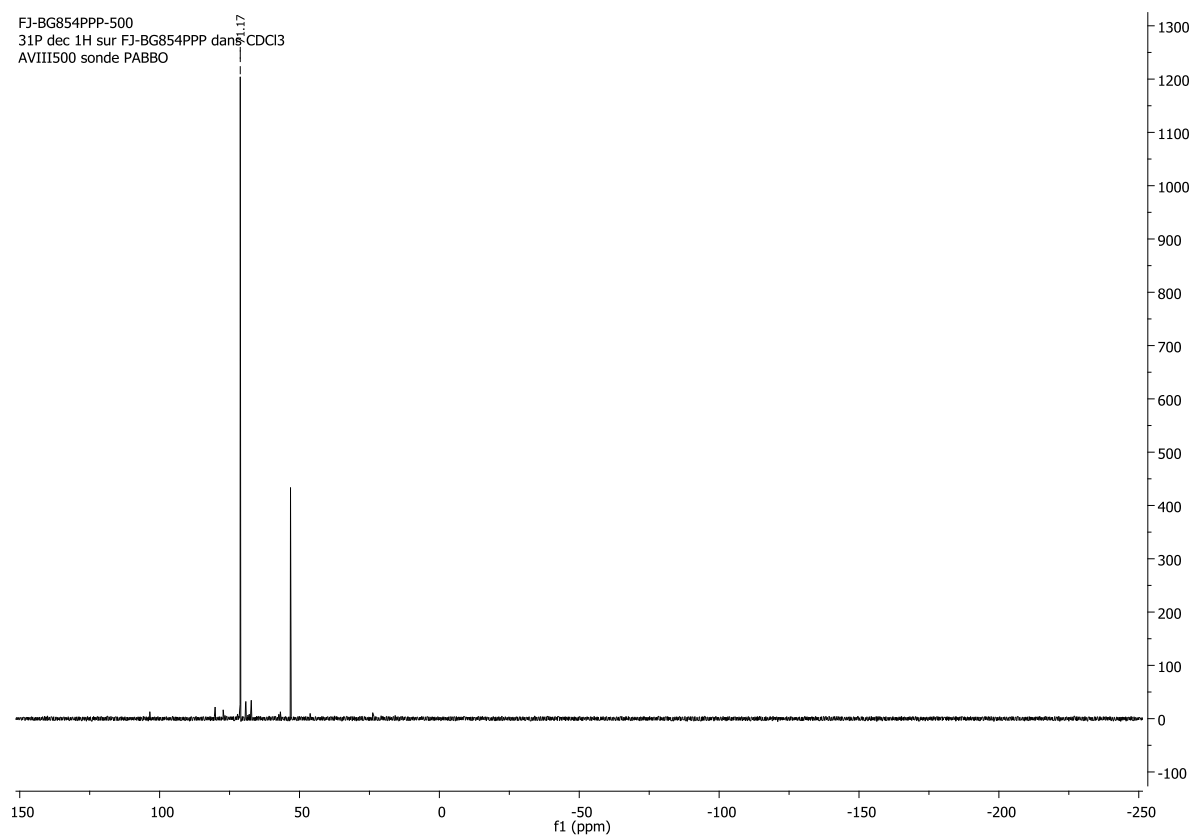

**Dimer of 2,4-bis(4-fluorophenyl)-1-phenyl-thiooxophosphole (5d)**

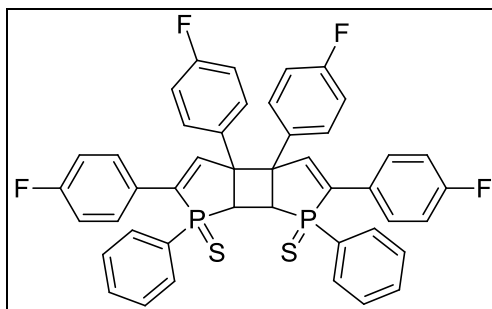

# <sup>1</sup>H (500 MHz, CDCl<sub>3</sub>)

FJ-BG-584r-500

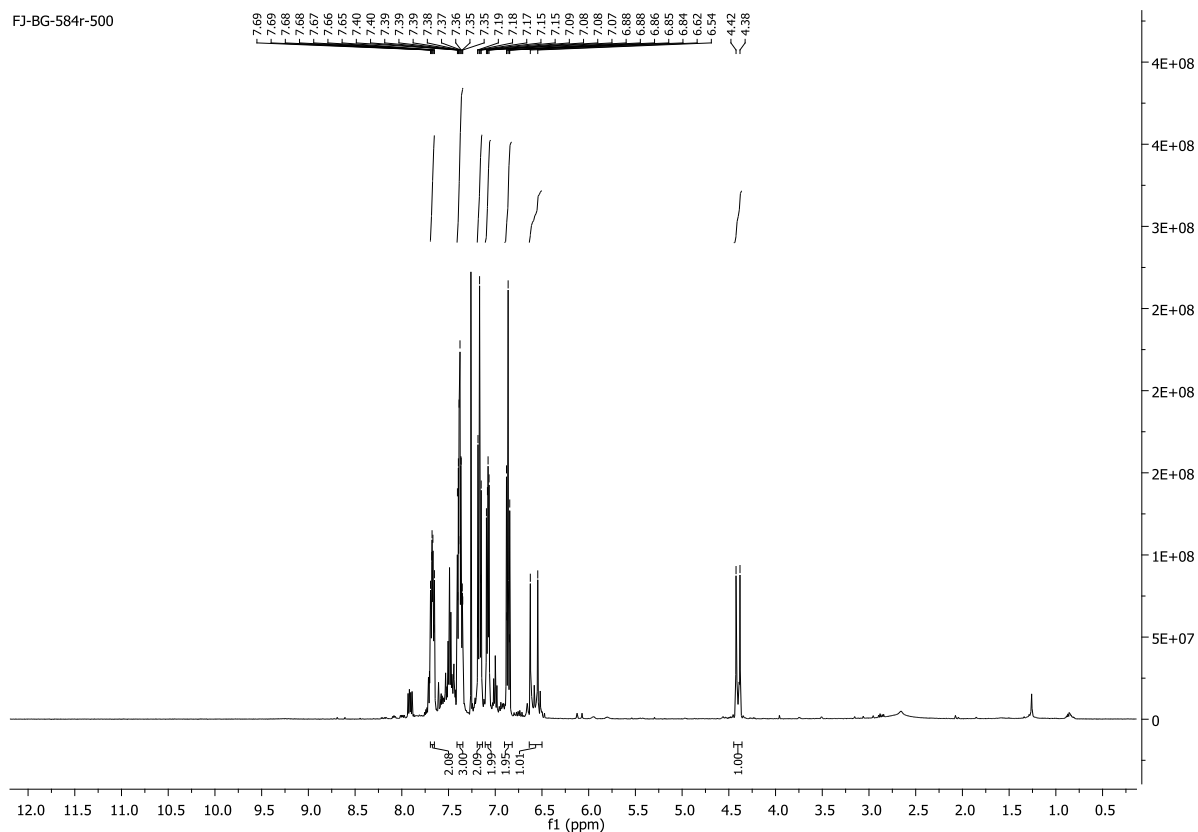

# <sup>13</sup>C jmod (125 MHz, CDCl<sub>3</sub>)

FJ-BG-584r-500

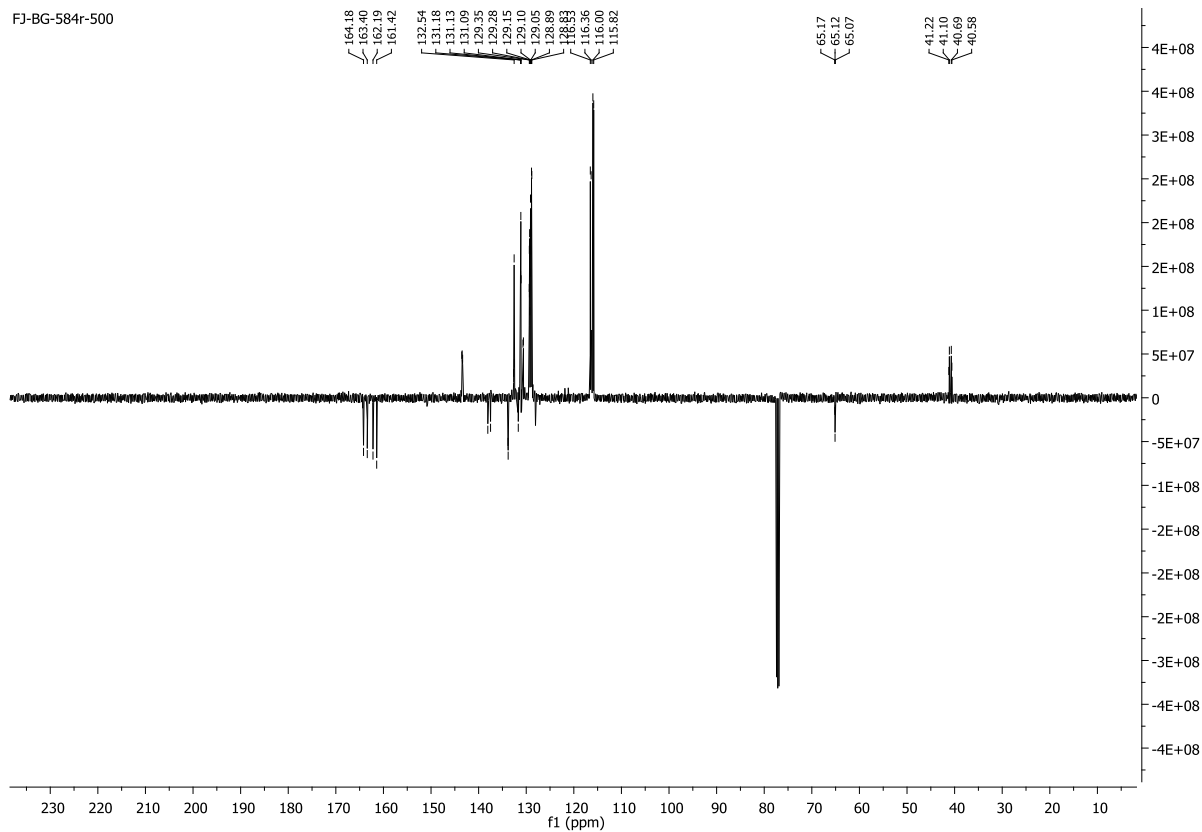



# $^{19}\text{F}$ (470 MHz, $\text{CDCl}_3$ )

FJ-BG-584r-500  
19F dec 1H

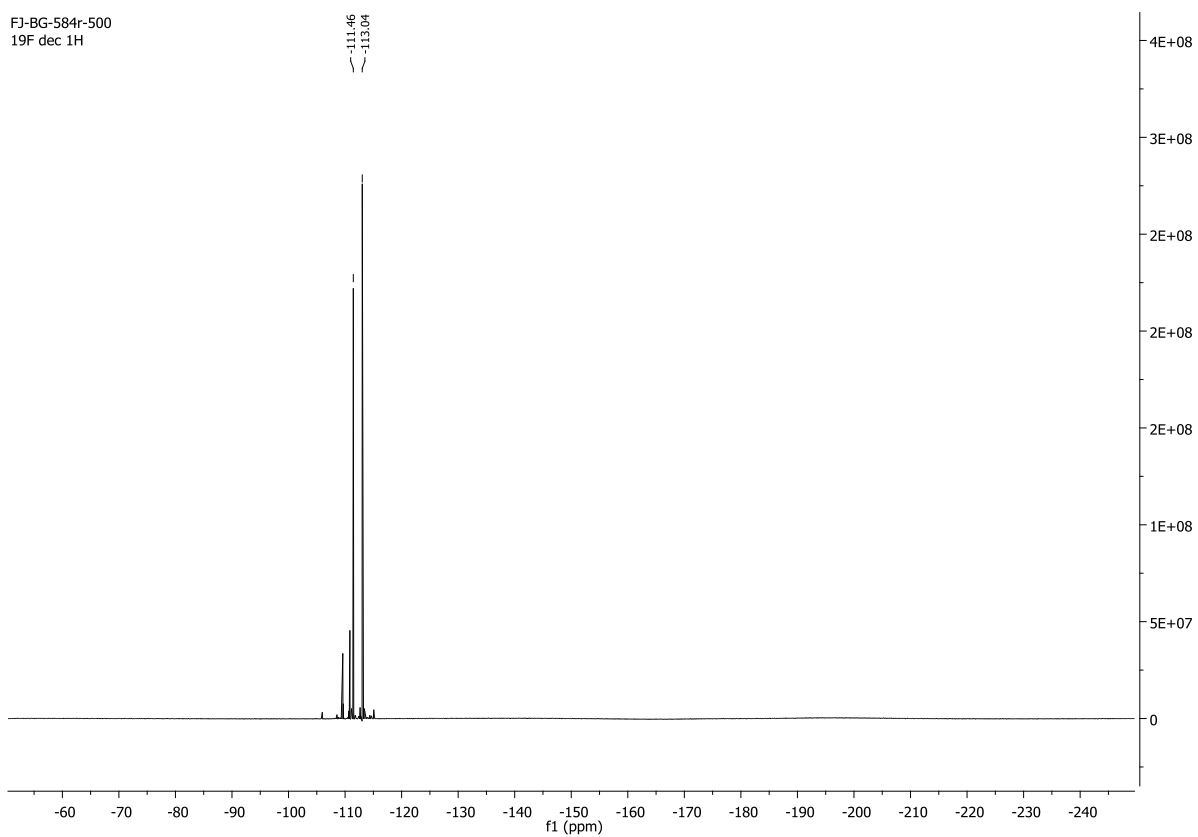

# $^{31}\text{P}$ (200 MHz, $\text{CDCl}_3$ )

FJ-BG-584r-500

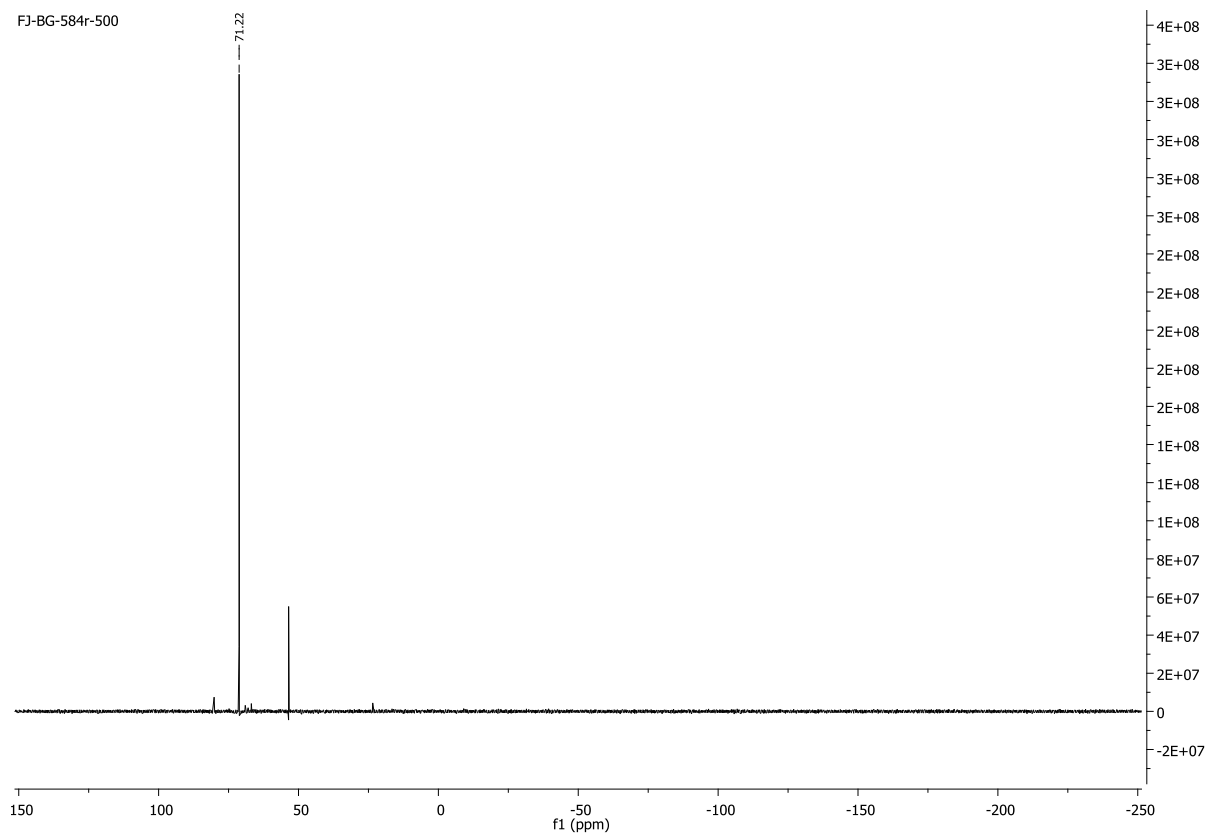

# 1,2,4-triphenyl-selenooxophosphole (6a)

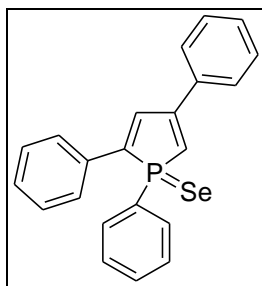

## $^1\text{H}$ (500 MHz, $\text{CDCl}_3$ )

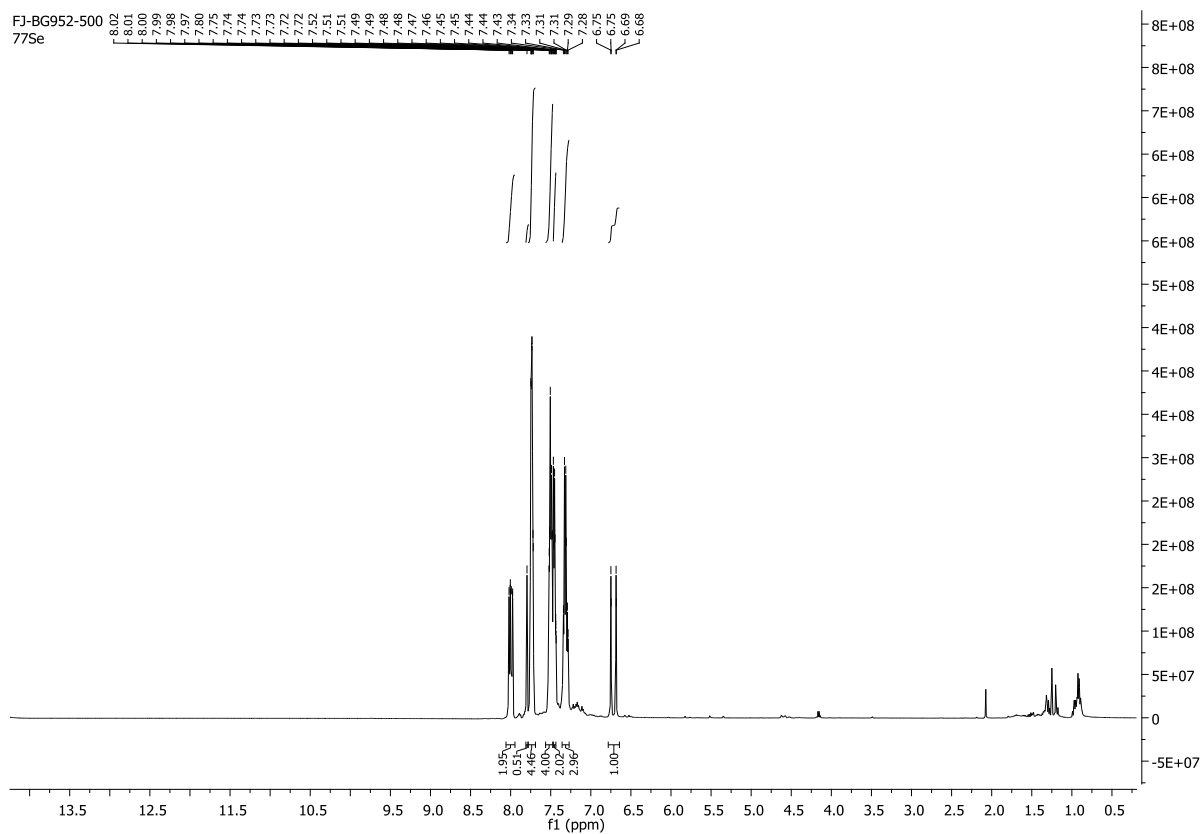

# $^{13}\text{C}$ (125 MHz, $\text{CDCl}_3$ )

FJ-BG952-500  
13C sur

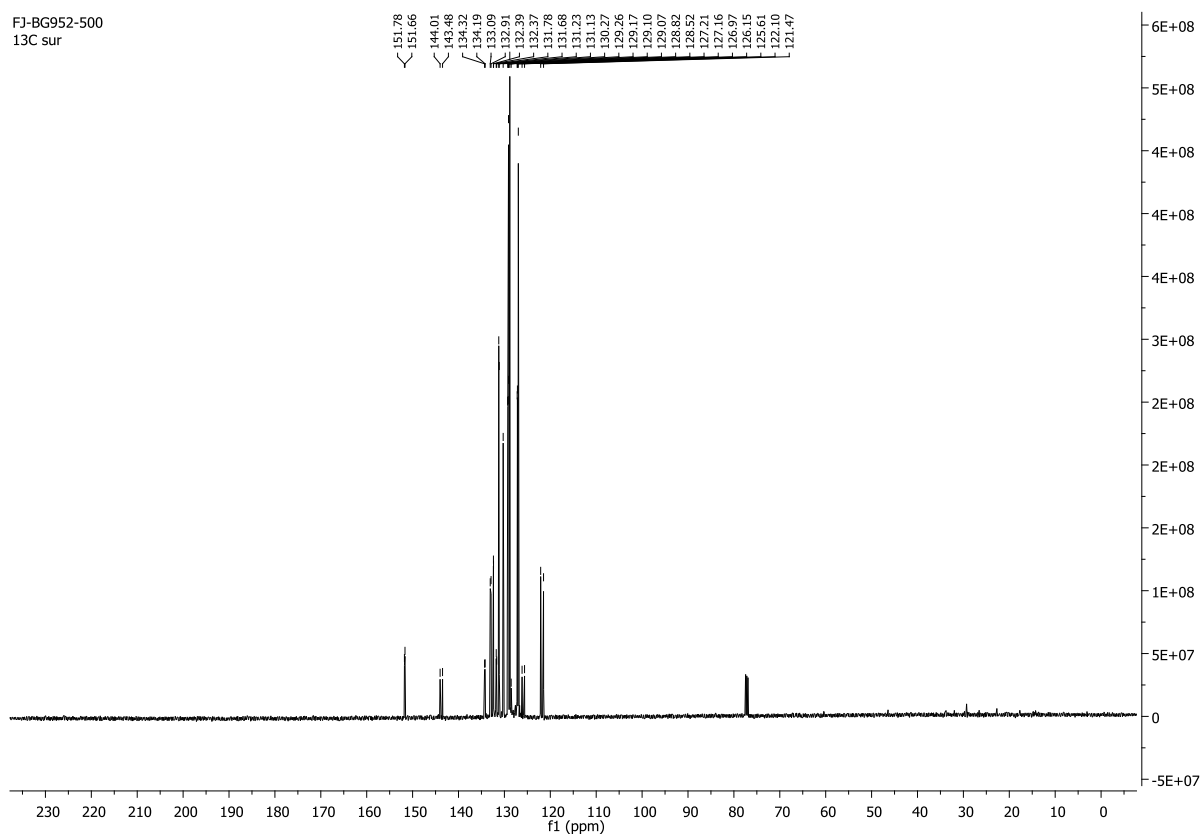

# $^{31}\text{P}$ (200 MHz, $\text{CDCl}_3$ )

FJ-BG952-500

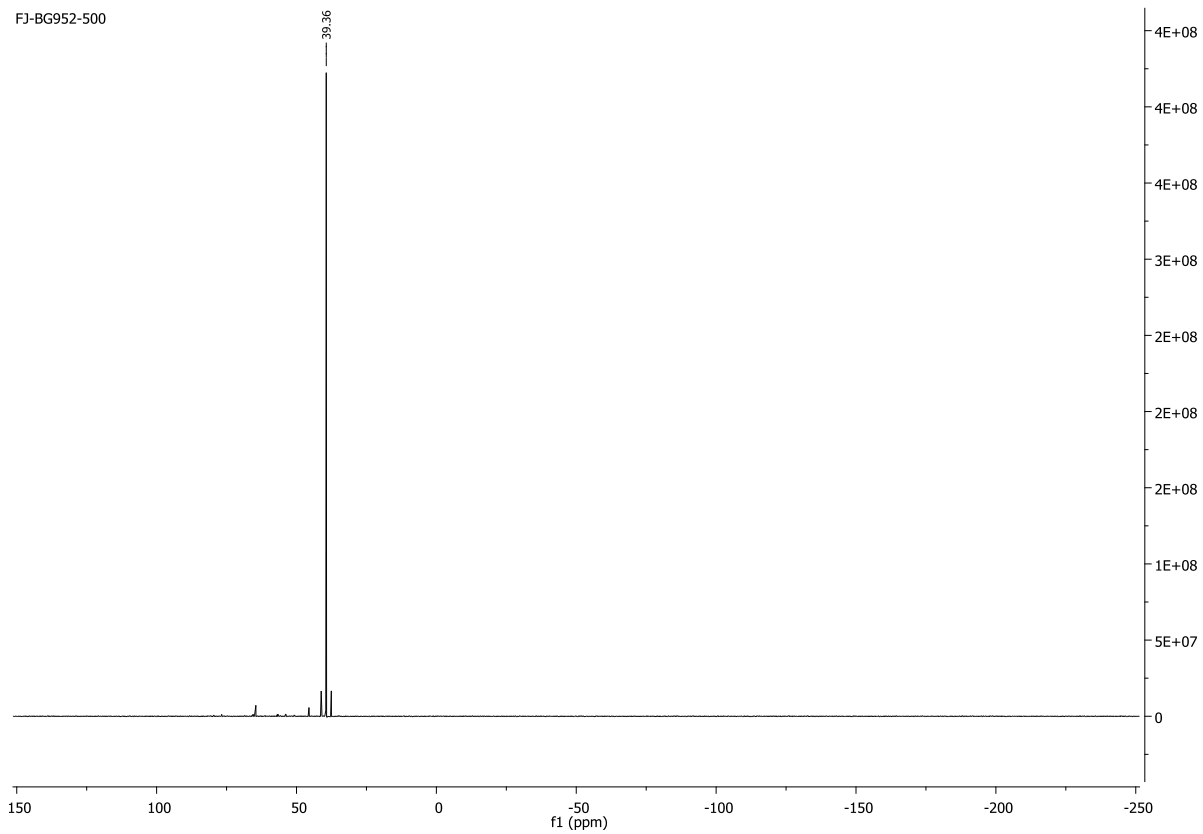

**$^{77}\text{Se}$  (96 MHz,  $\text{CDCl}_3$ )**

FJ-BG952-500  
 $^{77}\text{Se}$  sur FJ-BG952 dans  $\text{CDCl}_3$   
ns=128

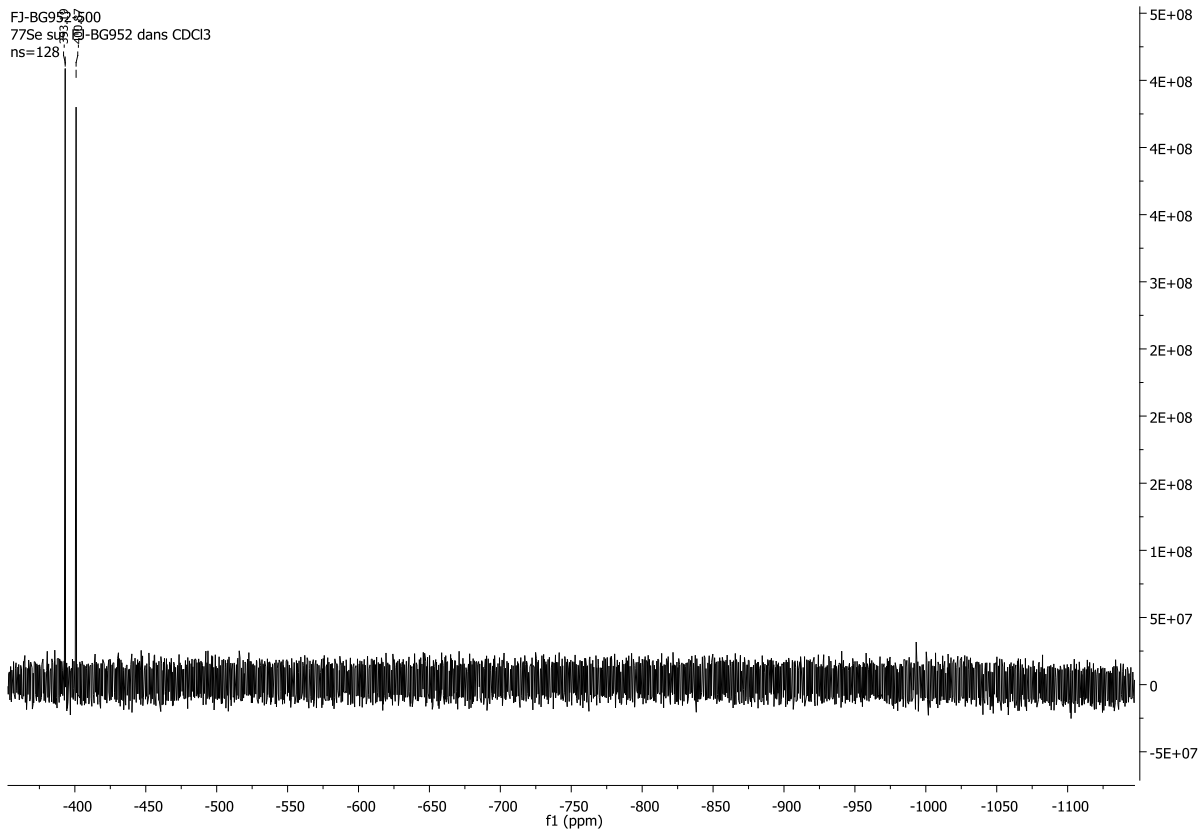

FJ-BG952-500  
 $^{77}\text{Se}$  sur FJ-BG952 dans  $\text{CDCl}_3$   
ns=128

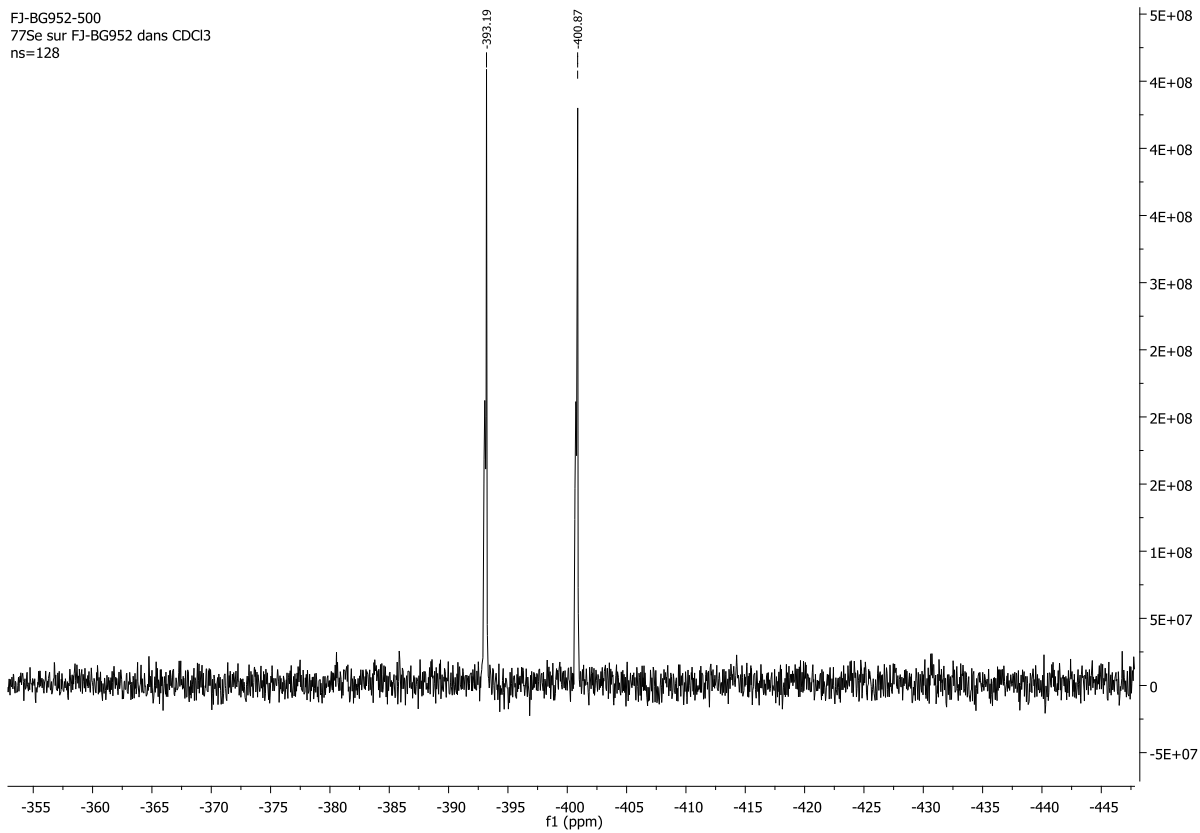

# 1-phenyl-2,4-bis(trimethylsilyl)-selenooxophosphole (6b)

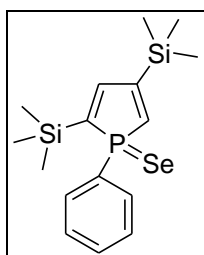

## $^1\text{H}$ (500 MHz, $\text{CDCl}_3$ )

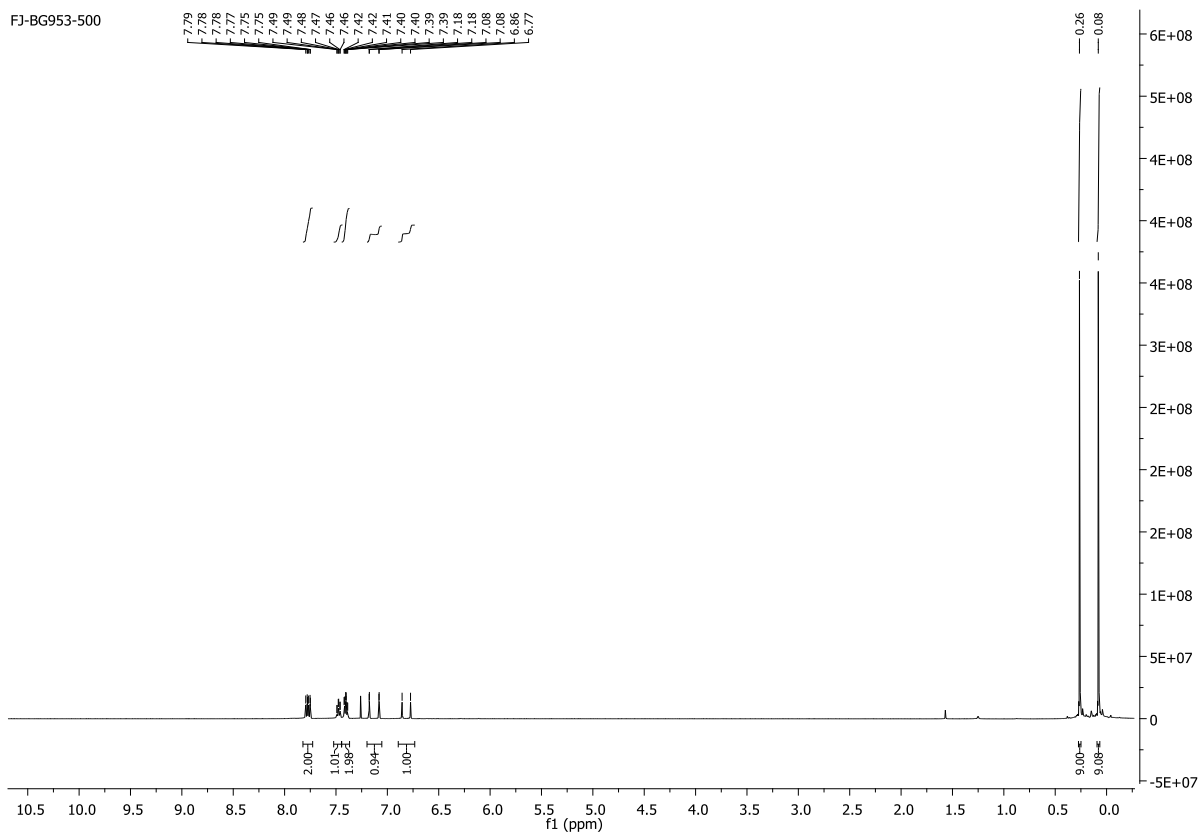

# $^{13}\text{C}$ (125 MHz, $\text{CDCl}_3$ )

FJ-BG953-500

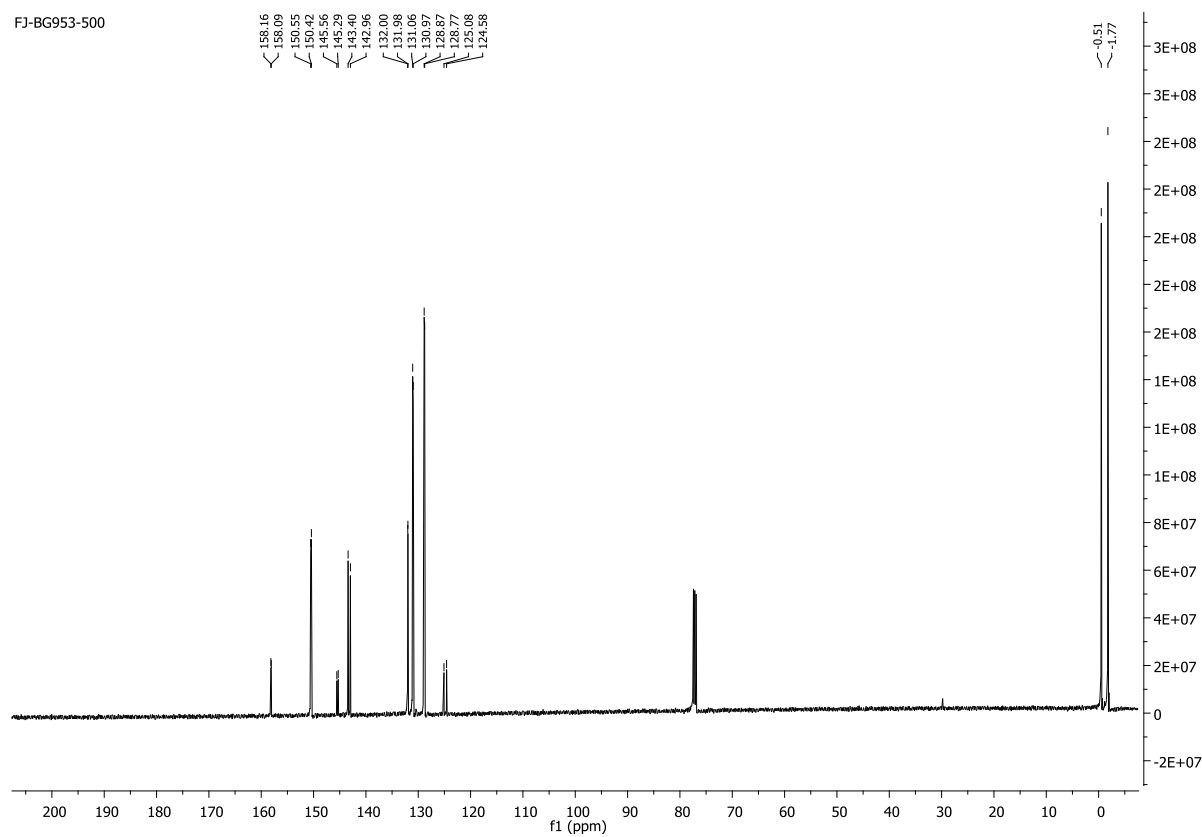

# $^{31}\text{P}$ (200 MHz, $\text{CDCl}_3$ )

FJ-BG953-500

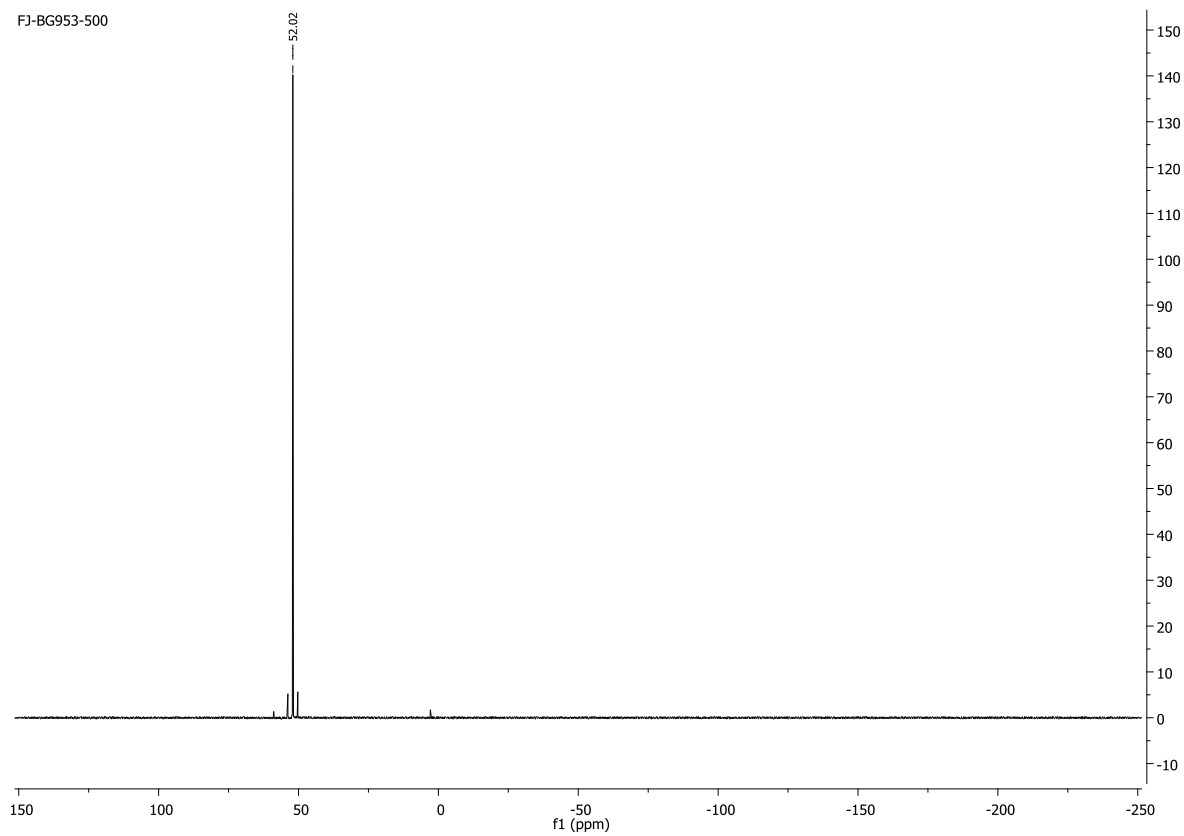

$^{29}\text{Si}$  (100 MHz,  $\text{CDCl}_3$ )

FJ-BG953-500  
29Si

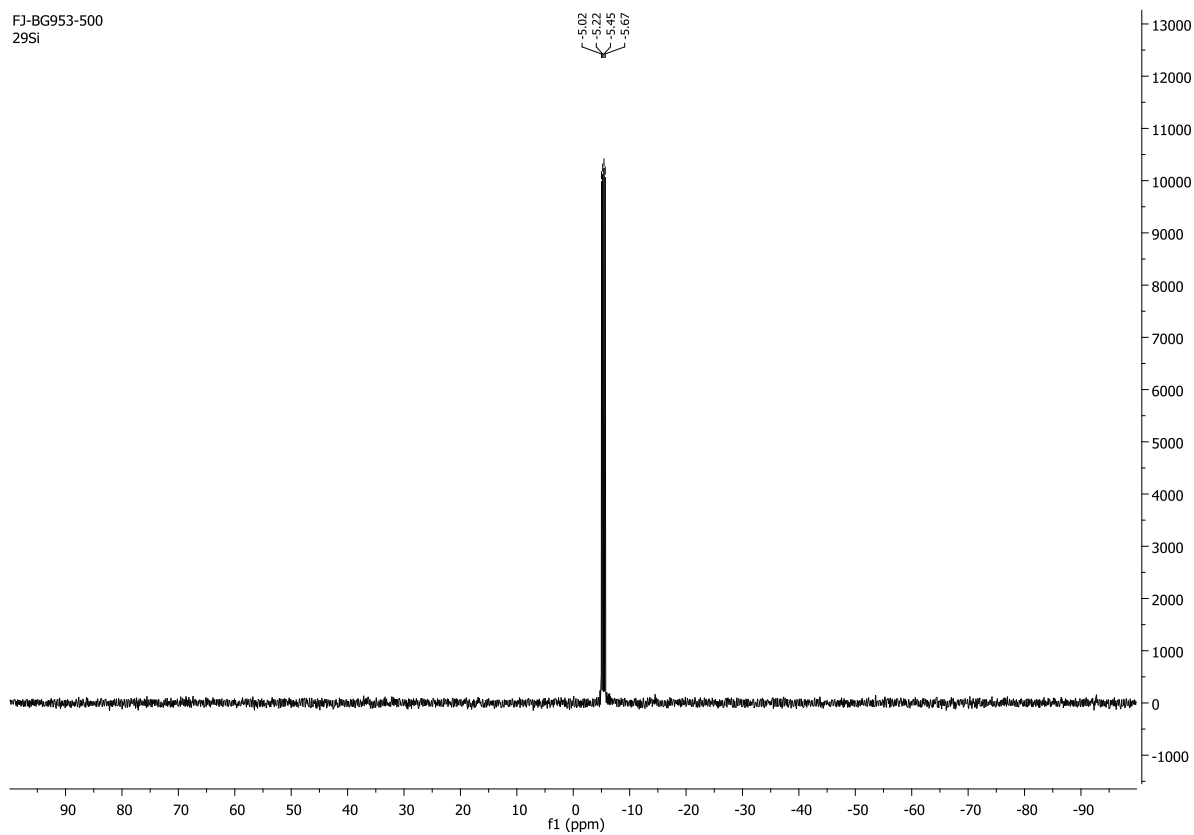

$^{77}\text{Se}$  (96 MHz,  $\text{CDCl}_3$ )

FJ-BG953-500  
77Se sur FJ-BG953 dans  $\text{CDCl}_3$

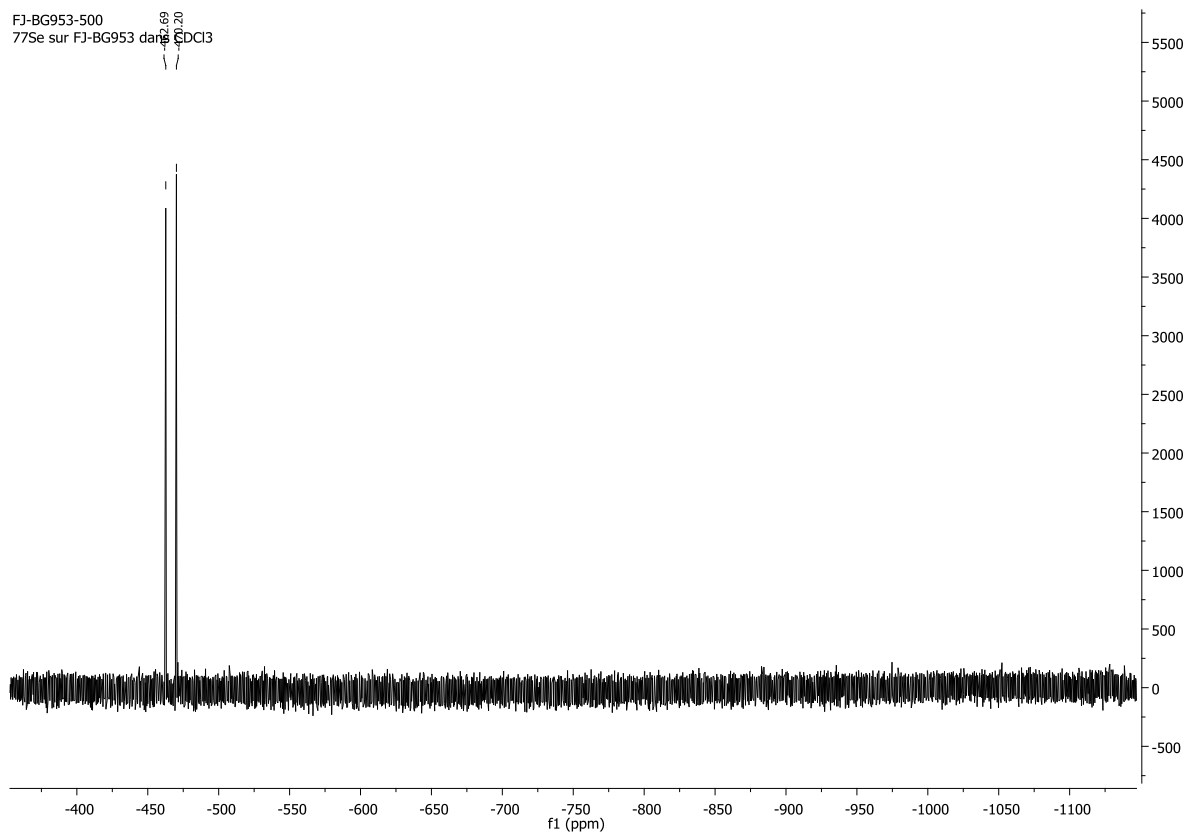

FJ-BG953-500  
77Se sur FJ-BG953 dans CDCl3

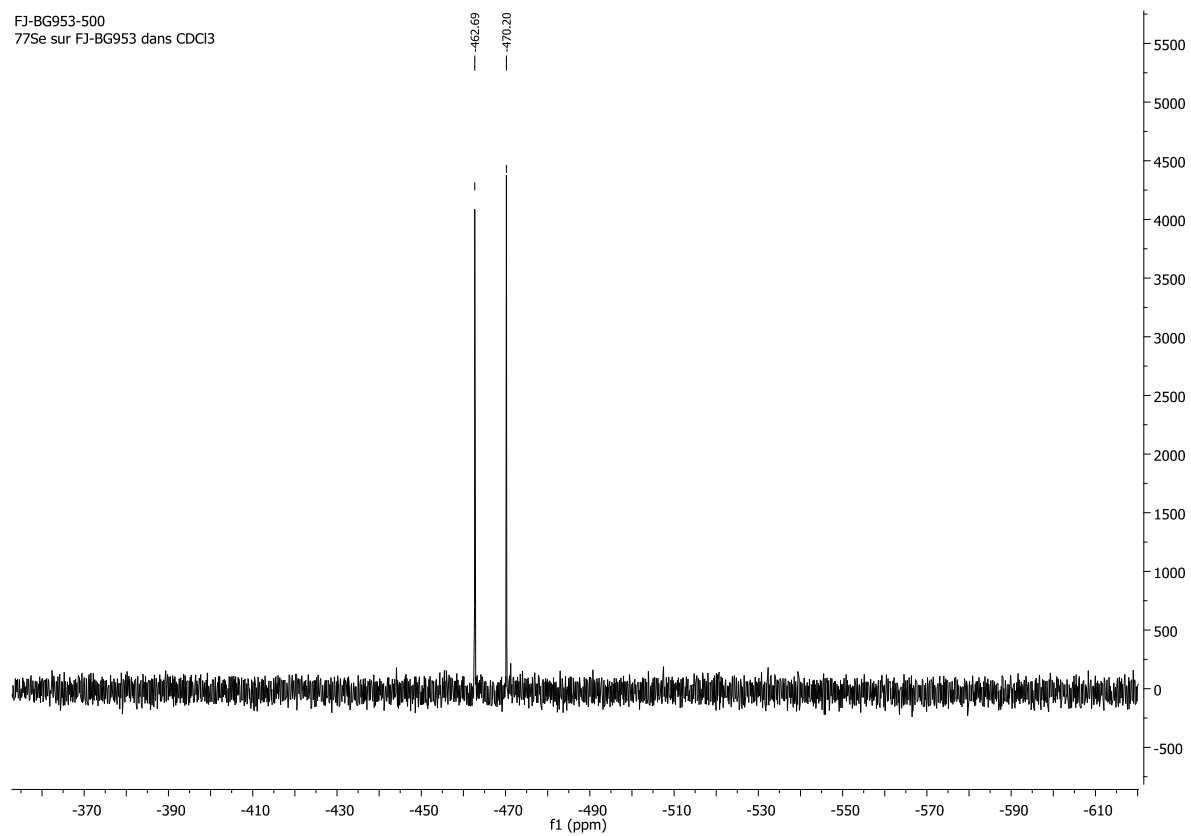

**2,4-bis(tert-butyl)-1-phenyl-selenooxophosphole (6c)**

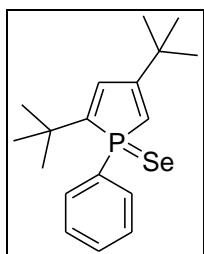



# <sup>1</sup>H (500 MHz, CDCl<sub>3</sub>)

FJ-BG954-500

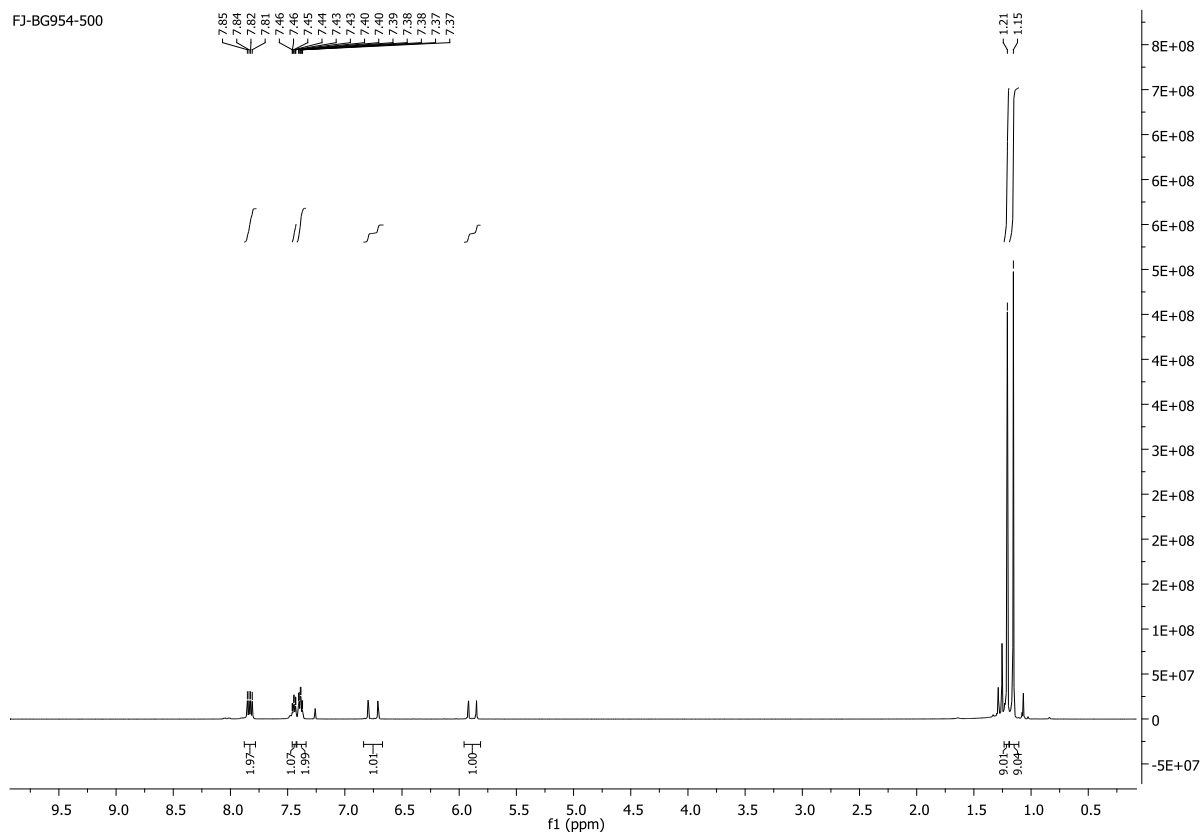

# <sup>13</sup>C (125 MHz, CDCl<sub>3</sub>)

FJ-BG954-500

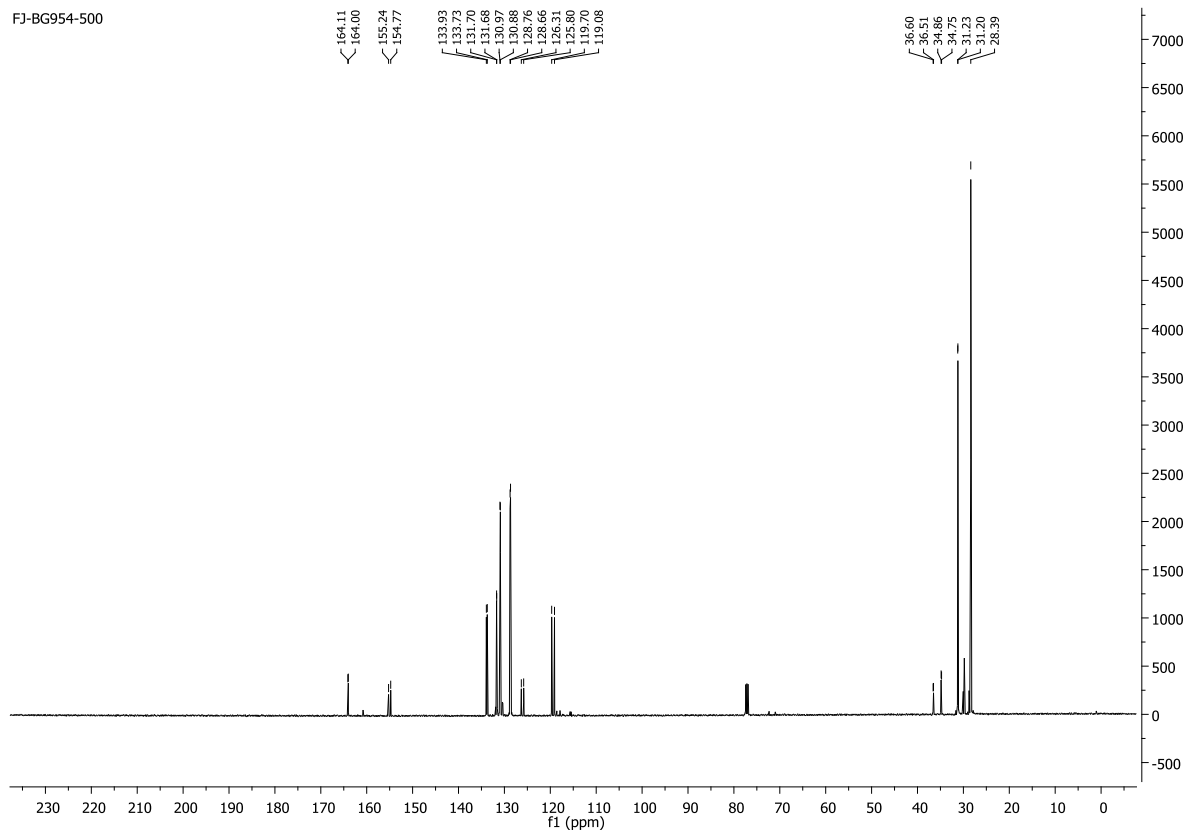

# $^{31}\text{P}$ (200 MHz, $\text{CDCl}_3$ )

FJ-BG954-500

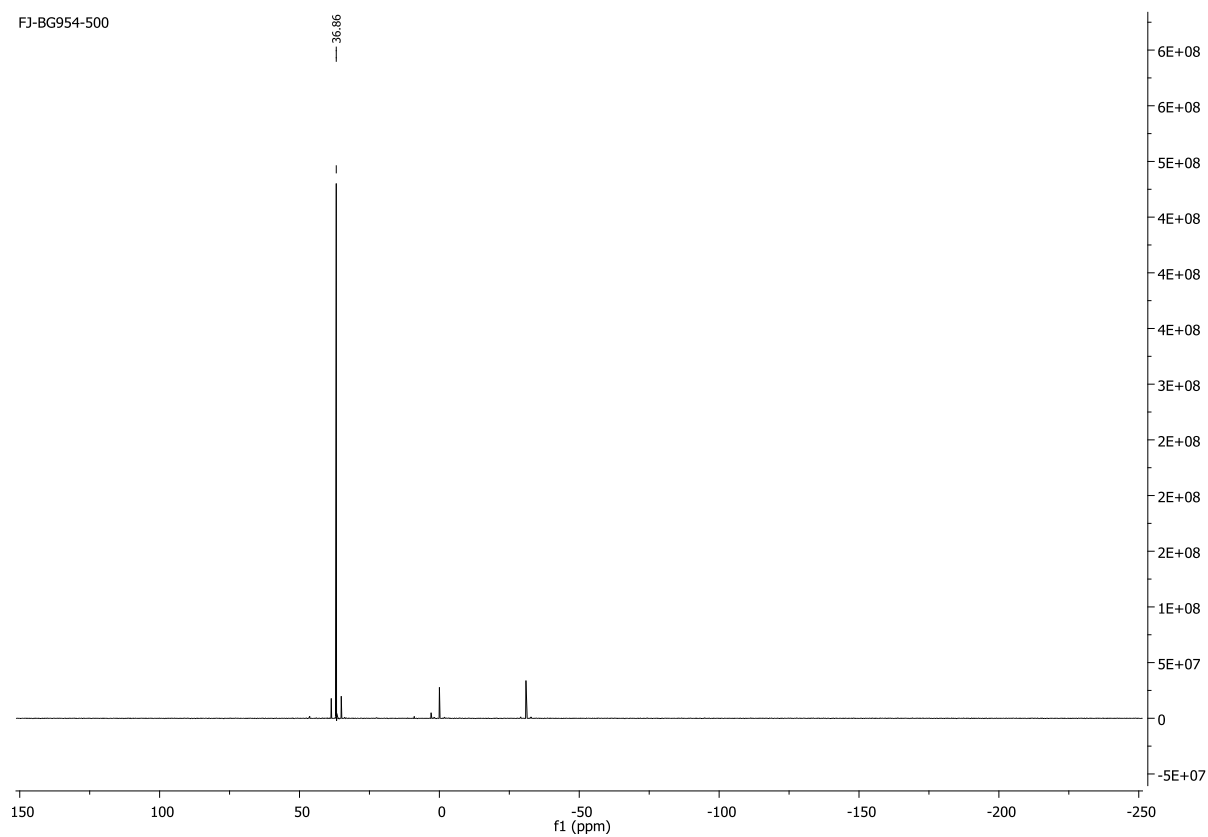

# $^{77}\text{Se}$ (96 MHz, $\text{CDCl}_3$ )

FJ-BG954-500  
77Se sur FJ-BG954 dans  $\text{CDCl}_3$   
ns=128

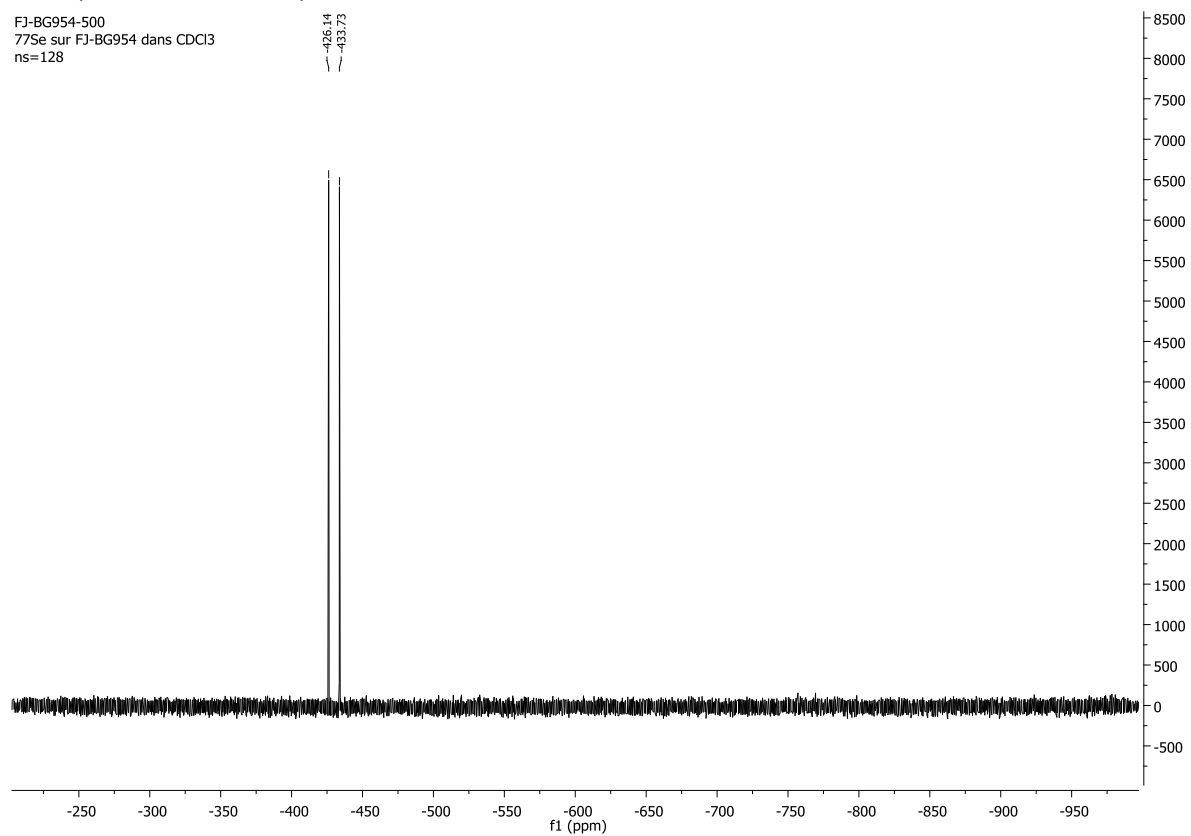

## Dimer of 1,2,4-triphenyl-selenooxophosphole (7a)

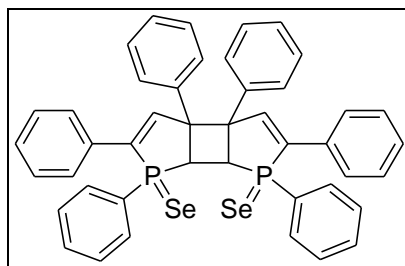

### $^1\text{H}$ (500 MHz, $\text{CDCl}_3$ )

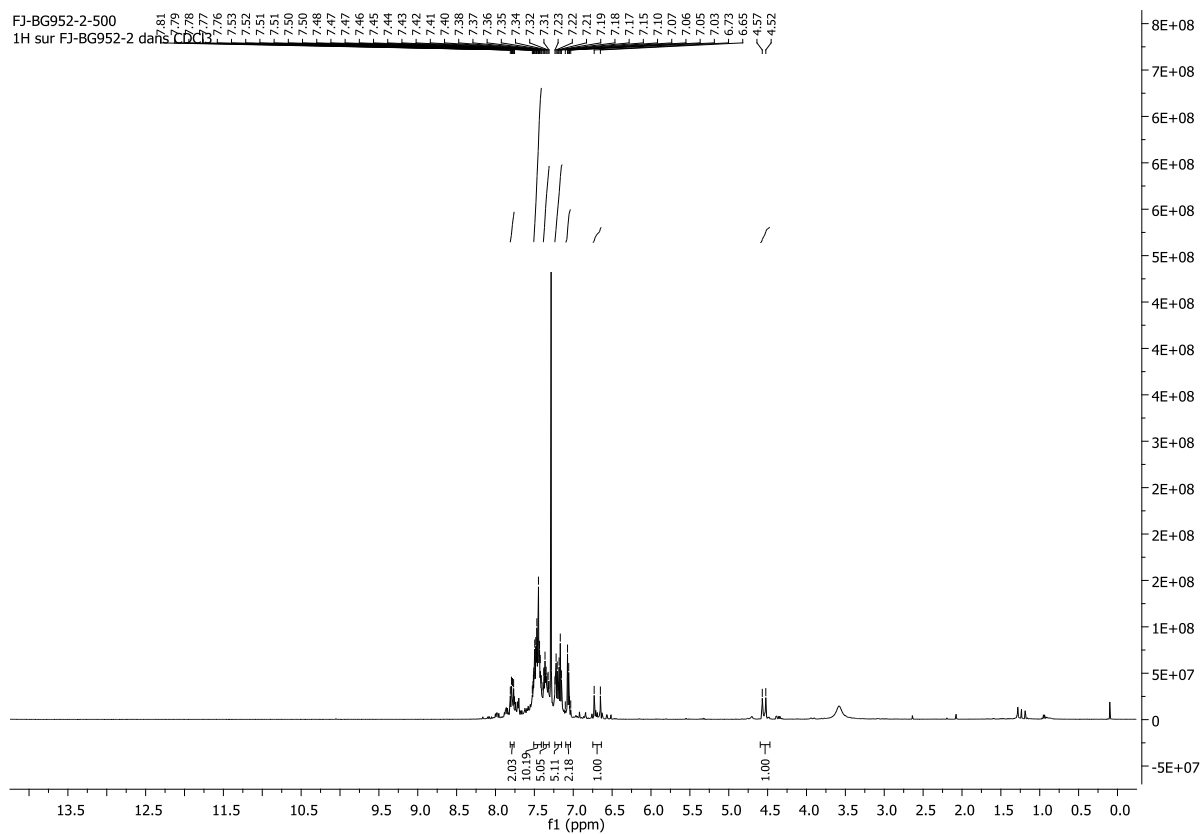

### $^{13}\text{C}$ (125 MHz, $\text{CDCl}_3$ )

FJ-BG952-2-500  
13C sur FJ-BG952-2 dans  $\text{CDCl}_3$

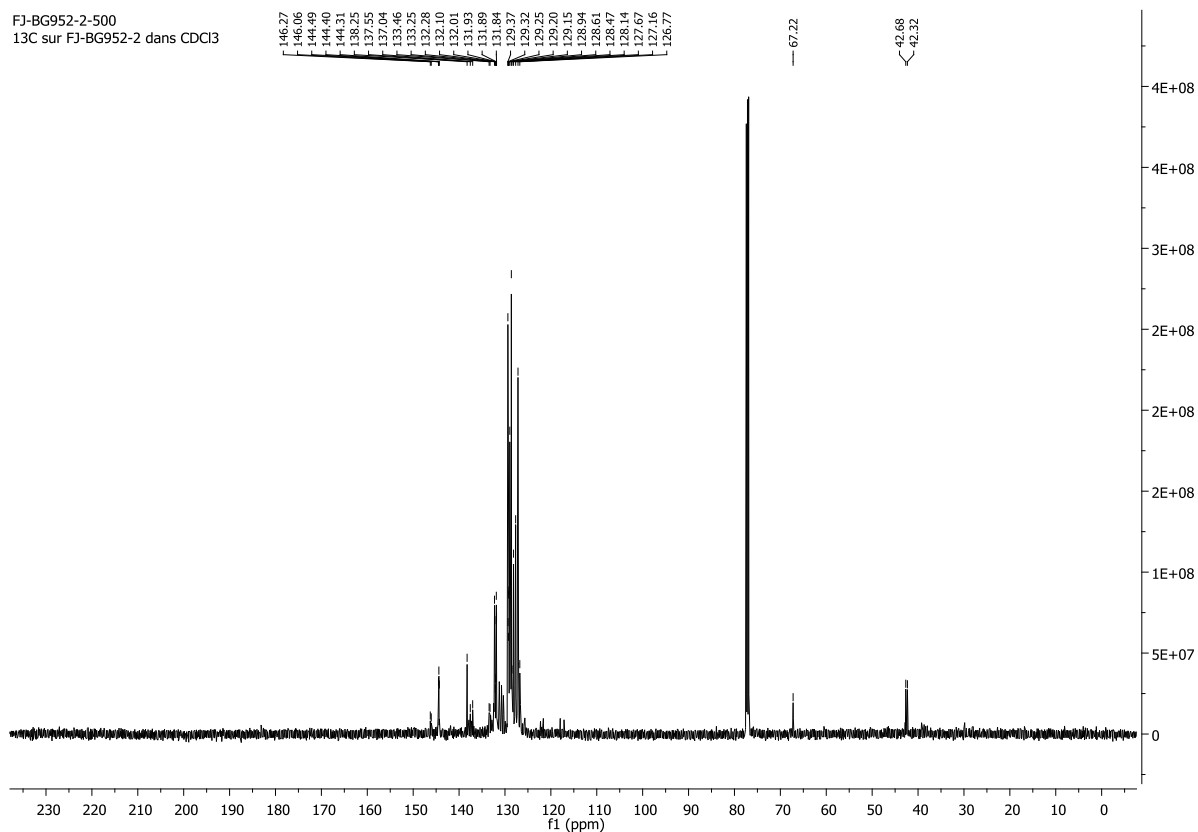

### $^{31}\text{P}$ (200 MHz, $\text{CDCl}_3$ )

FJ-BG952-2-500  
31P dec 1H sur FJ-BG952-2 dans  $\text{CDCl}_3$

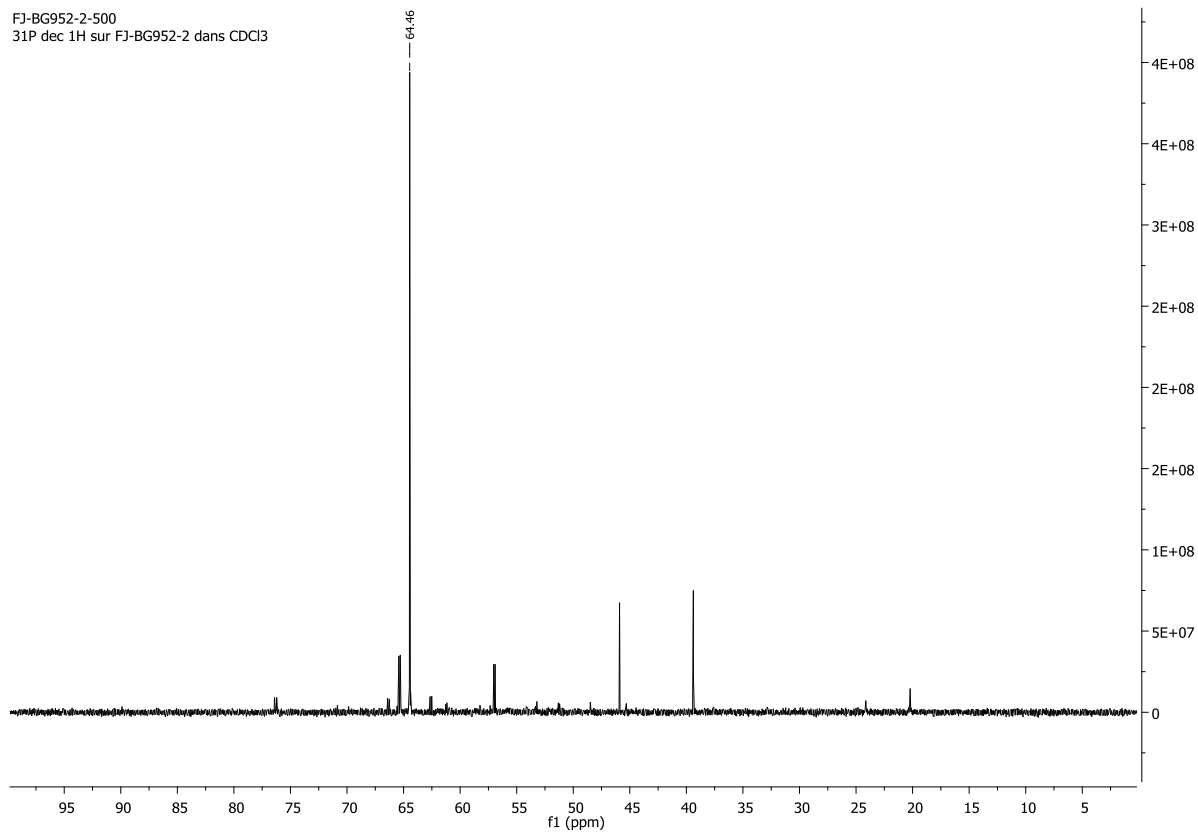

$^{77}\text{Se}$  (96 MHz,  $\text{CDCl}_3$ )

FJ-BG952-2-500  
77Se sur FJ-BG952-2 dans  $\text{CDCl}_3$   
ns=512

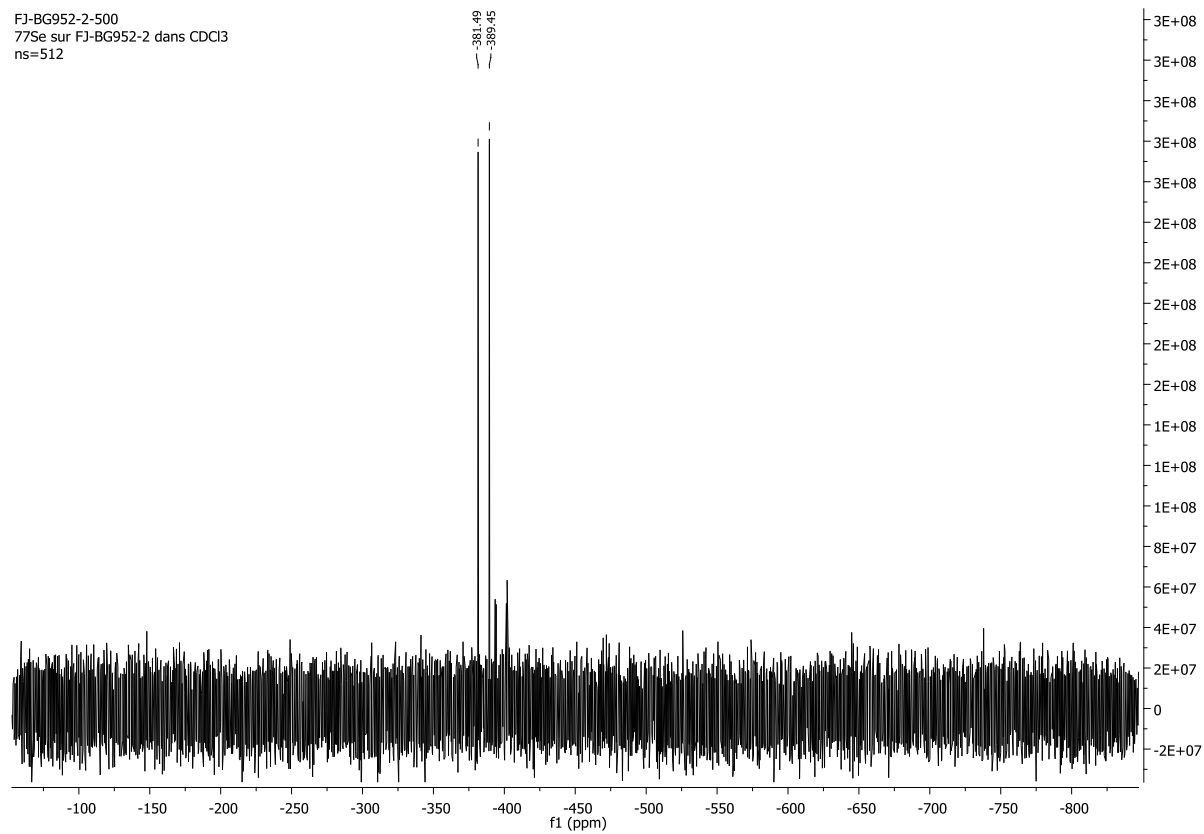

## II. Crystallographic data for 5d

|                         |                                                                                              |
|-------------------------|----------------------------------------------------------------------------------------------|
| CCDC 1882024            |                                                                                              |
| Molecular formula       | C <sub>46</sub> H <sub>32</sub> Cl <sub>6</sub> F <sub>4</sub> P <sub>2</sub> S <sub>2</sub> |
| Molecular weight        | 999.48                                                                                       |
| Crystal habit           | Colourless prismatic                                                                         |
| Crystal dimensions(mm)  | 0.2x0.2x0.1                                                                                  |
| Crystal system          | monoclinic                                                                                   |
| Space group             | C2/c                                                                                         |
| a(Å)                    | 22.047(5)                                                                                    |
| b(Å)                    | 8.630(5)                                                                                     |
| c(Å)                    | 23.537(5)                                                                                    |
| α(°)                    | 90.00                                                                                        |
| β(°)                    | 92.993(5)                                                                                    |
| γ(°)                    | 90.00                                                                                        |
| V(Å <sup>3</sup> )      | 4472(3)                                                                                      |
| Z                       | 4                                                                                            |
| d(g-cm <sup>-3</sup> )  | 1.484                                                                                        |
| F(000)                  | 2032                                                                                         |
| μ(cm <sup>-1</sup> )    | 0.600                                                                                        |
| Absorption corrections  | none                                                                                         |
| Diffractometer          | Brucker APEX-II CCD                                                                          |
| X-ray source            | MoK α                                                                                        |
| λ(Å)                    | 0.71073                                                                                      |
| Monochromator           | graphite                                                                                     |
| T (K)                   | 100.0(2)                                                                                     |
| Scan mode               | phi and omega scans                                                                          |
| Maximum θ               | 29.91                                                                                        |
| HKL ranges              | -32 32 ; -12 12 ; -34 34                                                                     |
| Reflections measured    | 45860                                                                                        |
| Unique data             | 7461                                                                                         |
| Rint                    | 0.0489                                                                                       |
| Reflections used        | 5166                                                                                         |
| Criterion               | I > 2σ(I)                                                                                    |
| Refinement type         | Fsqd                                                                                         |
| Hydrogen atoms          | geom                                                                                         |
| Parameters refined      | 307                                                                                          |
| Reflections / parameter | 24                                                                                           |
| wR2                     | 0.0898                                                                                       |
| R1                      | 0.0434                                                                                       |
| Weights a, b            | 0.0448 ; 3.6083                                                                              |
| GoF                     | 1.014                                                                                        |

### III. DFT Calculations

All computations were performed with Gaussian16, Rev B.01.<sup>1</sup> The functional used is B3LYP-D3<sup>2</sup>, and the basis set 6-31G\*<sup>3</sup> has been used for all atoms (P, C, H, O, S, Se).

#### 1a

| Element | X           | Y           | Z           |
|---------|-------------|-------------|-------------|
| C       | -1.19836700 | -1.06777799 | -1.01661897 |
| C       | -1.80169702 | 0.00706200  | -0.42782599 |
| C       | -0.86173803 | 1.08630300  | -0.11621800 |
| C       | 0.43460900  | 0.85643500  | -0.46754700 |
| H       | -1.71092606 | -1.97771800 | -1.30694497 |
| H       | -1.20076895 | 2.02374291  | 0.31677201  |
| C       | 1.50998294  | -1.81314802 | -0.28287101 |
| C       | 2.65605807  | -2.44475794 | -0.78184301 |
| C       | 1.14794195  | -2.00767994 | 1.05991495  |
| C       | 3.43272901  | -3.25890803 | 0.04812200  |
| H       | 2.94274712  | -2.30008197 | -1.82035995 |
| C       | 1.92146206  | -2.82048297 | 1.88561499  |
| H       | 0.26087001  | -1.51546800 | 1.44926798  |
| C       | 3.06600189  | -3.44758797 | 1.38045597  |
| H       | 4.32091808  | -3.74394298 | -0.34805900 |
| H       | 1.63529003  | -2.96520400 | 2.92420602  |
| H       | 3.66838789  | -4.08086014 | 2.02645612  |
| C       | 1.57933700  | 1.73870802  | -0.22353300 |
| C       | 2.70642900  | 1.72958195  | -1.06696200 |
| C       | 1.59281301  | 2.60309005  | 0.88921899  |
| C       | 3.79725194  | 2.55984902  | -0.81510299 |
| H       | 2.71486998  | 1.07973695  | -1.93782604 |
| C       | 2.68014407  | 3.43736410  | 1.13528705  |
| H       | 0.75137800  | 2.59650612  | 1.57625902  |
| C       | 3.78912807  | 3.42071891  | 0.28435001  |
| H       | 4.65389109  | 2.53775096  | -1.48363900 |
| H       | 2.66831112  | 4.09393597  | 2.00148392  |
| H       | 4.63978481  | 4.06765890  | 0.48050100  |
| C       | -3.24444103 | 0.10450000  | -0.12070900 |
| C       | -3.69367790 | 0.81875902  | 1.00385702  |
| C       | -4.20152283 | -0.52802598 | -0.93313098 |
| C       | -5.05195808 | 0.88901699  | 1.31123698  |
| H       | -2.97150302 | 1.30235100  | 1.65578496  |
| C       | -5.55909777 | -0.45778900 | -0.62633401 |
| H       | -3.87417603 | -1.05705202 | -1.82360899 |
| C       | -5.99093580 | 0.25103599  | 0.49776101  |
| H       | -5.37692785 | 1.44036901  | 2.18969202  |
| H       | -6.28263903 | -0.94886202 | -1.27177501 |
| H       | -7.04980898 | 0.30935699  | 0.73460603  |
| P       | 0.52983999  | -0.71998698 | -1.40437102 |

<sup>1</sup> Frisch, M. J.; Trucks, G. W.; Schlegel, H. B.; Scuseria, G. E.; Robb, M. A.; Cheeseman, J. R.; Scalmani, G.; Barone, V.; Mennucci, B.; Petersson, G. A.; Nakatsuji, H.; Caricato, M.; Li, X.; Hratchian, H. P.; Izmaylov, A. F.; Bloino, J.; Zheng, G.; Sonnenberg, J. L.; Hada, M.; Ehara, M.; Toyota, K.; Fukuda, R.; Hasegawa, J.; Ishida, M.; Nakajima, T.; Honda, Y.; Kitao, O.; Nakai, H.; Vreven, T.; Montgomery, Jr., J. A.; Peralta, J. E.; Ogliaro, F.; Bearpark, M.; Heyd, J. J.; Brothers, E.; Kudin, K. N.; Staroverov, V. N.; Kobayashi, R.; Normand, J.; Raghavachari, K.; Rendell, A.; Burant, J. C.; Iyengar, S. S.; Tomasi, J.; Cossi, M.; Rega, N.; Millam, N. J.; Klene, M.; Knox, J. E.; Cross, J. B.; Bakken, V.; Adamo, C.; Jaramillo, J.; Gomperts, R.; Stratmann, R. E.; Yazyev, O.; Austin, A. J.; Cammi, R.; Pomelli, C.; Ochterski, J. W.; Martin, R. L.; Morokuma, K.; Zakrzewski, V. G.; Voth, G. A.; Salvador, P.; Dannenberg, J. J.; Dapprich, S.; Daniels, A. D.; Farkas, Ö.; Foresman, J. B.; Ortiz, J. V.; Cioslowski, J.; Fox, D. J. *Gaussian 09, Revision D.01*, 2009.

<sup>2</sup> A. D. Becke, *Phys. Rev. A* **1988**, *38*, 3098–3100; C. Lee, W. Yang, R. G. Parr, *Phys. Rev. B* **1988**, *37*, 785–789; S. Grimme, J. Antony, S. Ehrlich, H. Krieg, *J. Chem. Phys.* **2010**, *132*, 154104.

<sup>3</sup> Francl, M. M. *J. Chem. Phys.* **1982**, *77*, 3654; Hariharan, P. C.; Pople, J. A. *Theor. Chim. Acta* **1973**, *28*, 213; Binning, R. C.; Curtiss, L. A. *J. Comput. Chem.* **1990**, *11*, 1206.

|                | 1       | 2       | 3       |
|----------------|---------|---------|---------|
|                | A       | A       | A       |
| Frequencies -- | 20.1722 | 29.2887 | 32.9932 |
| Red. masses -- | 3.8155  | 5.4582  | 5.2177  |
| Frc consts --  | 0.0009  | 0.0028  | 0.0033  |
| IR Inten --    | 0.0352  | 0.1545  | 0.1298  |

|                                              |              |
|----------------------------------------------|--------------|
| Sum of electronic and zero-point Energies=   | -1189.611369 |
| Sum of electronic and thermal Energies=      | -1189.592674 |
| Sum of electronic and thermal Enthalpies=    | -1189.591730 |
| Sum of electronic and thermal Free Energies= | -1189.661500 |

HF = -1189.93185902

### 1b

```

=====
Element          X           Y           Z
=====
C          1.07831097   -1.07506502   -1.03136802
C          1.85015595   -0.21311601   -0.30782101
C          1.09191597   0.97967303    0.10710700
C         -0.21213700    1.05369306   -0.28738701
H          1.42338395   -2.01605201   -1.44882905
H          1.56458902    1.75519395    0.71019799
P         -0.54008597   -0.34821200   -1.41324604
C         -1.76815295   -1.37243295   -0.48354501
C         -2.98948312   -1.69300497   -1.08999300
C         -1.52760398   -1.79142106    0.83525503
C         -3.96083403   -2.41428089   -0.38820800
H         -3.18420005   -1.37371099   -2.11068606
C         -2.49373794   -2.51370811    1.53227496
H         -0.58341599   -1.53744602    1.30962002
C         -3.71420598   -2.82426810    0.92199099
H         -4.90664721   -2.65430403   -0.86676401
H         -2.29987502   -2.83177710    2.55350995
H         -4.46839619   -3.38439298    1.46844494
C         -2.10816097    3.20092106   -1.41720402
C         -2.87388897    1.63773096    1.12938404
C         -0.55502599    3.69163203    1.22605395
H         -1.30473995    3.66965294   -1.99742699
H         -2.58798504    2.45358992   -2.06063008
H         -2.85311294    3.97235298   -1.18532205
H         -2.51754808    1.14247406    2.03995299
H         -3.60155106    2.40520406    1.42183495
H         -3.39726400    0.88141900    0.53374499
H         -1.24568796    4.49216890    1.51782095
H         -0.15629400    3.24640298    2.14545298
H          0.28058299    4.15308905    0.68643397
C          3.84685206   -0.37977800    2.01144195
C          4.18854284   -2.20519900   -0.47620001
C          4.72012711    0.84456402   -0.68647301
H          3.49702001    0.58972102    2.38664603
H          3.26400995   -1.16008902    2.51503301
H          4.89499712   -0.49445200    2.31416202
H          4.09107018   -2.29115009   -1.56493497
H          5.23636389   -2.40355396   -0.22029200
H          3.57931805   -2.99545908   -0.02169500
H          5.77903414    0.72656602   -0.42465001
H          4.63644409    0.80269200   -1.77879202
H          4.40748405    1.84639704   -0.36804700
Si         -1.43759096    2.40001392    0.16062200
Si          3.66027999   -0.49479899    0.13023899
=====

```

|                | 1       | 2       | 3       |
|----------------|---------|---------|---------|
|                | A       | A       | A       |
| Frequencies -- | 15.2919 | 17.4310 | 30.6660 |
| Red. masses -- | 3.2255  | 2.9836  | 4.2233  |
| Frc consts --  | 0.0004  | 0.0005  | 0.0023  |
| IR Inten --    | 0.0254  | 0.0175  | 0.1146  |

|                                            |              |
|--------------------------------------------|--------------|
| Sum of electronic and zero-point Energies= | -1544.817016 |
| Sum of electronic and thermal Energies=    | -1544.791607 |
| Sum of electronic and thermal Enthalpies=  | -1544.790663 |



Sum of electronic and thermal Free Energies= -1544.874272

HF = -1545.17896838

**1c**

| Element | X           | Y           | Z           |
|---------|-------------|-------------|-------------|
| C       | 0.97071803  | -1.04614604 | -1.07538497 |
| C       | 1.88162005  | -0.45272800 | -0.26330999 |
| C       | 1.41334701  | 0.84413499  | 0.25446400  |
| C       | 0.17554000  | 1.24023902  | -0.13457200 |
| H       | 1.09553301  | -2.00360394 | -1.56602705 |
| H       | 2.04531407  | 1.43844295  | 0.90757000  |
| P       | -0.45997000 | 0.02714300  | -1.37315798 |
| C       | -1.81922603 | -0.85232198 | -0.46883801 |
| C       | -3.07121491 | -0.98686999 | -1.08168304 |
| C       | -1.63019502 | -1.37340796 | 0.82137799  |
| C       | -4.12211895 | -1.62550998 | -0.41521099 |
| H       | -3.22674990 | -0.58779299 | -2.08094501 |
| C       | -2.67706800 | -2.00874996 | 1.48580098  |
| H       | -0.65855402 | -1.27139401 | 1.29762602  |
| C       | -3.92685008 | -2.13487911 | 0.86831897  |
| H       | -5.08998299 | -1.72301900 | -0.90005398 |
| H       | -2.52216911 | -2.40610290 | 2.48581290  |
| H       | -4.74282312 | -2.63012004 | 1.38813102  |
| C       | -0.61836702 | 3.44246507  | -1.02925301 |
| C       | -1.94756997 | 2.26618910  | 0.75525600  |
| C       | 0.26287800  | 3.30555701  | 1.31553495  |
| H       | 0.37818000  | 3.66489100  | -1.42722905 |
| H       | -1.19610202 | 2.95479202  | -1.82158005 |
| H       | -1.11094797 | 4.39148092  | -0.78249401 |
| H       | -1.92405605 | 1.60808694  | 1.63046205  |
| H       | -2.43336797 | 3.20699096  | 1.04177701  |
| H       | -2.57287788 | 1.78313398  | -0.00206700 |
| H       | -0.26862299 | 4.22503519  | 1.58628905  |
| H       | 0.37509999  | 2.69989705  | 2.22214293  |
| H       | 1.26206303  | 3.59015608  | 0.96666700  |
| C       | 3.32644105  | -1.14573300 | 1.65794897  |
| C       | 3.50773597  | -2.37728810 | -0.51842999 |
| C       | 4.34747410  | -0.01938400 | -0.35712299 |
| H       | 3.17205811  | -0.18728900 | 2.16527891  |
| H       | 2.56376505  | -1.84492397 | 2.01983500  |
| H       | 4.31030416  | -1.52738905 | 1.95711994  |
| H       | 3.48348808  | -2.31996489 | -1.61246502 |
| H       | 4.49434614  | -2.75249195 | -0.22310001 |
| H       | 2.75903893  | -3.11071205 | -0.19789900 |
| H       | 5.34113216  | -0.39462799 | -0.08264000 |
| H       | 4.31482792  | 0.09997100  | -1.44593596 |
| H       | 4.22772598  | 0.97182798  | 0.09359300  |
| C       | -0.52117699 | 2.54542089  | 0.22826700  |
| C       | 3.25185299  | -1.00138998 | 0.11975100  |

|                | 1<br>A  | 2<br>A  | 3<br>A  |
|----------------|---------|---------|---------|
| Frequencies -- | 17.3731 | 35.1313 | 40.0969 |
| Red. masses -- | 2.8844  | 3.5880  | 3.6234  |
| Frc consts --  | 0.0005  | 0.0026  | 0.0034  |
| IR Inten --    | 0.0379  | 0.1202  | 0.0624  |

Sum of electronic and zero-point Energies= -1041.959153  
Sum of electronic and thermal Energies= -1041.939037  
Sum of electronic and thermal Enthalpies= -1041.938092  
Sum of electronic and thermal Free Energies= -1042.008019

HF = -1042.34446406

**1d**

| Element | X           | Y          | Z          |
|---------|-------------|------------|------------|
| C       | -1.20490694 | 1.18843997 | 1.04675698 |

|   |             |             |             |
|---|-------------|-------------|-------------|
| C | -1.70044100 | 0.03842000  | 0.50107902  |
| C | -0.65836602 | -0.94983900 | 0.21261799  |
| C | 0.61059701  | -0.57652700 | 0.53952003  |
| H | -1.80455506 | 2.05059004  | 1.31532097  |
| H | -0.90403998 | -1.93166900 | -0.18378200 |
| C | 1.40821302  | 2.17835903  | 0.25258499  |
| C | 2.49532509  | 2.93137908  | 0.71384799  |
| C | 1.01178503  | 2.29437900  | -1.08956397 |
| C | 3.18046904  | 3.78790307  | -0.15321299 |
| H | 2.80738211  | 2.84885693  | 1.75186002  |
| C | 1.69392204  | 3.14961600  | -1.95210898 |
| H | 0.17026301  | 1.70857203  | -1.44936001 |
| C | 2.78031898  | 3.89781308  | -1.48476005 |
| H | 4.02345991  | 4.36738110  | 0.21359301  |
| H | 1.38185203  | 3.23336601  | -2.98990512 |
| H | 3.31147695  | 4.56393909  | -2.15947604 |
| C | 1.83790600  | -1.34278595 | 0.30812201  |
| C | 2.96791291  | -1.18893194 | 1.13444698  |
| C | 1.93137801  | -2.23760200 | -0.77691901 |
| C | 4.13984489  | -1.90468299 | 0.90088600  |
| H | 2.92050791  | -0.51400298 | 1.98408699  |
| C | 3.09308290  | -2.96480799 | -1.01830399 |
| H | 1.08847499  | -2.34378791 | -1.45309305 |
| C | 4.18365479  | -2.78668499 | -0.17253800 |
| H | 5.01087809  | -1.79418004 | 1.53817105  |
| H | 3.17243290  | -3.65143895 | -1.85466695 |
| C | -3.12820792 | -0.21820199 | 0.21956000  |
| C | -3.51608109 | -1.01599896 | -0.87178802 |
| C | -4.13733006 | 0.34198901  | 1.02306998  |
| C | -4.86022615 | -1.24117696 | -1.16223705 |
| H | -2.75817490 | -1.44821501 | -1.51839304 |
| C | -5.48519802 | 0.12705600  | 0.74640000  |
| H | -3.85912204 | 0.93478799  | 1.88915002  |
| C | -5.82632303 | -0.66351098 | -0.34611699 |
| H | -5.16765785 | -1.84867096 | -2.00692797 |
| H | -6.26930714 | 0.54884499  | 1.36636806  |
| P | 0.55359399  | 1.03257704  | 1.42262805  |
| F | 5.31531811  | -3.48419309 | -0.40568700 |
| F | -7.12995911 | -0.88032299 | -0.61769402 |

=====

|                | 1       | 2       | 3       |
|----------------|---------|---------|---------|
|                | A       | A       | A       |
| Frequencies -- | 20.8332 | 26.9623 | 27.2431 |
| Red. masses -- | 4.0947  | 5.8937  | 7.9409  |
| Frc consts --  | 0.0010  | 0.0025  | 0.0035  |
| IR Inten --    | 0.0336  | 0.1686  | 0.1845  |

Sum of electronic and zero-point Energies= -1388.094390  
Sum of electronic and thermal Energies= -1388.073991  
Sum of electronic and thermal Enthalpies= -1388.073047  
Sum of electronic and thermal Free Energies= -1388.147005

HF = -1388.39842578

## 2a

=====

| Element | X           | Y           | Z           |
|---------|-------------|-------------|-------------|
| C       | 1.24009299  | -0.92295301 | 1.12064803  |
| C       | 1.80014002  | 0.09862200  | 0.42777300  |
| C       | 0.82749701  | 1.14249897  | 0.00026300  |
| C       | -0.46070799 | 0.93664700  | 0.35203701  |
| H       | 1.76638806  | -1.79510498 | 1.48806798  |
| H       | 1.17429602  | 2.03527403  | -0.51266199 |
| C       | -1.32702100 | -1.82760000 | 0.07341700  |
| C       | -2.44394493 | -2.54770088 | 0.51246101  |
| C       | -0.85758299 | -1.99254596 | -1.23778498 |
| C       | -3.08803892 | -3.43130112 | -0.35711801 |
| H       | -2.79422498 | -2.40752006 | 1.53092098  |
| C       | -1.50372100 | -2.87392092 | -2.10227299 |
| H       | 0.00931700  | -1.43192601 | -1.57807696 |
| C       | -2.61951089 | -3.59408689 | -1.66182005 |
| H       | -3.95468903 | -3.99056602 | -0.01507300 |

|   |             |             |             |
|---|-------------|-------------|-------------|
| H | -1.13960803 | -3.00123692 | -3.11823893 |
| H | -3.12178707 | -4.28107405 | -2.33781409 |
| C | -1.62447500 | 1.78033495  | 0.07212400  |
| C | -2.76686692 | 1.70905995  | 0.89319402  |
| C | -1.63290298 | 2.67090392  | -1.01890004 |
| C | -3.87304711 | 2.51720691  | 0.63555002  |
| H | -2.76972604 | 1.03150403  | 1.74197495  |
| C | -2.73984909 | 3.47609711  | -1.27116203 |
| H | -0.77366602 | 2.71225095  | -1.68266702 |
| C | -3.86496496 | 3.40346193  | -0.44363499 |
| H | -4.74401999 | 2.45453000  | 1.28227997  |
| H | -2.73082304 | 4.15428591  | -2.12037492 |
| H | -4.73065519 | 4.02878714  | -0.64455402 |
| C | 3.23445392  | 0.21600001  | 0.09999200  |
| C | 3.65414190  | 0.84547299  | -1.08481896 |
| C | 4.21309185  | -0.31230199 | 0.96091199  |
| C | 5.00873804  | 0.93104500  | -1.40576804 |
| H | 2.91615605  | 1.24706697  | -1.77329099 |
| C | 5.56569099  | -0.22106300 | 0.64271402  |
| H | 3.90585399  | -0.77203602 | 1.89570606  |
| C | 5.96921682  | 0.39967901  | -0.54321003 |
| H | 5.31313610  | 1.41258097  | -2.33106899 |
| H | 6.30762005  | -0.62671602 | 1.32508099  |
| H | 7.02489901  | 0.47274801  | -0.78949702 |
| P | -0.54809302 | -0.67326099 | 1.25465798  |
| O | -1.21245503 | -0.69565803 | 2.60398102  |

=====

|                | 1       | 2       | 3       |
|----------------|---------|---------|---------|
|                | A       | A       | A       |
| Frequencies -- | 26.5957 | 27.7491 | 34.6945 |
| Red. masses -- | 4.3020  | 4.9264  | 5.5426  |
| Frc consts --  | 0.0018  | 0.0022  | 0.0039  |
| IR Inten --    | 0.1101  | 0.2733  | 0.2168  |

Sum of electronic and zero-point Energies= -1264.849763  
Sum of electronic and thermal Energies= -1264.830140  
Sum of electronic and thermal Enthalpies= -1264.829196  
Sum of electronic and thermal Free Energies= -1264.900444

HF = -1265.17498537

## 2b

| Element | X           | Y           | Z           |
|---------|-------------|-------------|-------------|
| C       | -1.13712299 | -0.86589402 | 1.17266095  |
| C       | -1.85738206 | -0.11138500 | 0.31371900  |
| C       | -1.05714703 | 1.02224505  | -0.26363200 |
| C       | 0.23281400  | 1.13875103  | 0.11822700  |
| H       | -1.49804997 | -1.73888505 | 1.70593905  |
| H       | -1.53041995 | 1.71336699  | -0.96131998 |
| P       | 0.57863402  | -0.24273400 | 1.26982296  |
| C       | 1.58946598  | -1.42115796 | 0.29899600  |
| C       | 2.77978206  | -1.87913895 | 0.87518603  |
| C       | 1.23317206  | -1.83483100 | -0.99268198 |
| C       | 3.61150694  | -2.74573708 | 0.16092500  |
| H       | 3.04269505  | -1.54535496 | 1.87494504  |
| C       | 2.06501889  | -2.69937611 | -1.70188200 |
| H       | 0.31136301  | -1.47379398 | -1.44201696 |
| C       | 3.25592089  | -3.15455008 | -1.12544894 |
| H       | 4.53637981  | -3.09893203 | 0.60907501  |
| H       | 1.78871596  | -3.01754808 | -2.70370007 |
| H       | 3.90454412  | -3.82660699 | -1.68114305 |
| C       | 2.03305101  | 3.32403398  | 1.21000397  |
| C       | 2.98553109  | 1.54592502  | -1.13977802 |
| C       | 0.71447802  | 3.61653304  | -1.61272001 |
| H       | 1.22291505  | 3.95099497  | 1.60064602  |
| H       | 2.28097701  | 2.58704090  | 1.98283303  |
| H       | 2.90756011  | 3.96418405  | 1.04091799  |
| H       | 2.69029903  | 0.96550900  | -2.02143788 |
| H       | 3.75517201  | 2.26496506  | -1.44658399 |
| H       | 3.43955803  | 0.84733897  | -0.42793700 |
| H       | 1.42338705  | 4.39868689  | -1.91033494 |

|    |             |             |             |
|----|-------------|-------------|-------------|
| H  | 0.40033501  | 3.09012294  | -2.52211308 |
| H  | -0.16655099 | 4.11290216  | -1.18839395 |
| C  | -3.72188592 | -0.77940899 | -2.01435208 |
| C  | -4.31233120 | -1.89152300 | 0.82928097  |
| C  | -4.65234804 | 1.14389300  | 0.22524901  |
| H  | -3.30055904 | 0.05055800  | -2.59450293 |
| H  | -3.15143609 | -1.68253005 | -2.26174903 |
| H  | -4.75399780 | -0.93112898 | -2.35328603 |
| H  | -4.26210880 | -1.70211899 | 1.90790796  |
| H  | -5.35909891 | -2.09767890 | 0.57572800  |
| H  | -3.73523092 | -2.80004001 | 0.62030298  |
| H  | -5.70169592 | 1.02659297  | -0.07192600 |
| H  | -4.62958813 | 1.37511206  | 1.29646695  |
| H  | -4.25076723 | 2.01214600  | -0.31108600 |
| Si | 1.50463700  | 2.43279099  | -0.36714199 |
| Si | -3.66030192 | -0.42038199 | -0.15671200 |
| O  | 1.19503498  | 0.07151500  | 2.60585690  |

=====

|                | 1       | 2       | 3       |
|----------------|---------|---------|---------|
|                | A       | A       | A       |
| Frequencies -- | 19.4589 | 25.4024 | 28.7994 |
| Red. masses -- | 3.0432  | 3.2175  | 4.2890  |
| Frc consts --  | 0.0007  | 0.0012  | 0.0021  |
| IR Inten --    | 0.0468  | 0.0777  | 0.2518  |

|                                              |              |
|----------------------------------------------|--------------|
| Sum of electronic and zero-point Energies=   | -1620.055505 |
| Sum of electronic and thermal Energies=      | -1620.029121 |
| Sum of electronic and thermal Enthalpies=    | -1620.028177 |
| Sum of electronic and thermal Free Energies= | -1620.113270 |

HF = -1620.42197728

## 2c

| Element | X           | Y           | Z           |
|---------|-------------|-------------|-------------|
| C       | -1.03289497 | -0.92155498 | 1.16513801  |
| C       | -1.90232003 | -0.43483901 | 0.25676000  |
| C       | -1.42572498 | 0.81693703  | -0.41338599 |
| C       | -0.21598400 | 1.27964997  | -0.04784900 |
| H       | -1.16020596 | -1.81943405 | 1.75551796  |
| H       | -2.05563092 | 1.31331396  | -1.14508498 |
| P       | 0.46903500  | 0.09444500  | 1.19066799  |
| C       | 1.72261095  | -0.89329302 | 0.29244500  |
| C       | 2.97995996  | -1.04199600 | 0.88833302  |
| C       | 1.46683300  | -1.47924900 | -0.95572901 |
| C       | 3.97837400  | -1.77104998 | 0.23703200  |
| H       | 3.16215205  | -0.57962602 | 1.85426795  |
| C       | 2.46586299  | -2.20346308 | -1.60376501 |
| H       | 0.49003199  | -1.36246896 | -1.41833103 |
| C       | 3.72318792  | -2.34947300 | -1.00741696 |
| H       | 4.95430613  | -1.88508296 | 0.70130801  |
| H       | 2.26716495  | -2.65422392 | -2.57257199 |
| H       | 4.50108290  | -2.91424298 | -1.51446998 |
| C       | 0.53816801  | 3.51667190  | 0.72230399  |
| C       | 1.92537796  | 2.23651290  | -0.94746500 |
| C       | -0.27503800 | 3.22708988  | -1.64582896 |
| H       | -0.47291499 | 3.79678893  | 1.03900301  |
| H       | 1.04209805  | 3.05134010  | 1.57459295  |
| H       | 1.07848895  | 4.43100691  | 0.44692400  |
| H       | 1.93364096  | 1.51472199  | -1.77154803 |
| H       | 2.41550899  | 3.15607500  | -1.28831995 |
| H       | 2.52541494  | 1.82043099  | -0.13206901 |
| H       | 0.24707900  | 4.14072418  | -1.95160997 |
| H       | -0.34232599 | 2.56693602  | -2.51881695 |
| H       | -1.29151905 | 3.51026297  | -1.34897304 |
| C       | -3.23331189 | -1.38785195 | -1.62835705 |
| C       | -3.54949999 | -2.30606198 | 0.68615299  |
| C       | -4.36139488 | 0.00789100  | 0.15162000  |
| H       | -3.04619908 | -0.50895602 | -2.25476003 |
| H       | -2.45588803 | -2.12978292 | -1.84467804 |
| H       | -4.20029593 | -1.81017995 | -1.92630398 |
| H       | -3.57721400 | -2.09774804 | 1.76146901  |

|   |             |             |             |
|---|-------------|-------------|-------------|
| H | -4.52454805 | -2.71391392 | 0.39696699  |
| H | -2.79479599 | -3.07992196 | 0.50616097  |
| H | -5.33802414 | -0.40504801 | -0.12751199 |
| H | -4.39234114 | 0.27371100  | 1.21396101  |
| H | -4.21383905 | 0.92870200  | -0.42267299 |
| C | 0.48265201  | 2.55179501  | -0.48907501 |
| C | -3.24977899 | -1.03280401 | -0.12237400 |
| O | 0.99884701  | 0.64380902  | 2.48703599  |

|                | 1       | 2       | 3       |
|----------------|---------|---------|---------|
|                | A       | A       | A       |
| Frequencies -- | 33.1787 | 37.2974 | 40.2453 |
| Red. masses -- | 3.7301  | 3.0668  | 3.5841  |
| Frc consts --  | 0.0024  | 0.0025  | 0.0034  |
| IR Inten --    | 0.2345  | 0.1156  | 0.0989  |

Sum of electronic and zero-point Energies= -1117.200432  
Sum of electronic and thermal Energies= -1117.179376  
Sum of electronic and thermal Enthalpies= -1117.178431  
Sum of electronic and thermal Free Energies= -1117.249607

HF = -1117.59040394

#### 4a

| Element | X           | Y           | Z           |
|---------|-------------|-------------|-------------|
| C       | -1.27657700 | 1.07670200  | 0.79926002  |
| C       | -1.87209797 | -0.02468900 | 0.28009200  |
| C       | -0.92842501 | -1.13569403 | 0.00590600  |
| C       | 0.36828199  | -0.92399901 | 0.32918200  |
| H       | -1.76828694 | 2.00093699  | 1.07441401  |
| H       | -1.29036903 | -2.07976794 | -0.39117301 |
| C       | 1.38560295  | 1.73560596  | -0.24793500 |
| C       | 2.50312996  | 2.50175905  | 0.09510900  |
| C       | 0.95519298  | 1.67910397  | -1.58262599 |
| C       | 3.18946695  | 3.21037412  | -0.89424598 |
| H       | 2.82700896  | 2.53838396  | 1.13130403  |
| C       | 1.64287806  | 2.38806891  | -2.56499290 |
| H       | 0.08751900  | 1.08154404  | -1.84901905 |
| C       | 2.76151991  | 3.15447092  | -2.22121000 |
| H       | 4.05809784  | 3.80502200  | -0.62517297 |
| H       | 1.30841100  | 2.34348893  | -3.59789109 |
| H       | 3.29712605  | 3.70610595  | -2.98919702 |
| C       | 1.50155497  | -1.82355201 | 0.08991500  |
| C       | 2.65780711  | -1.77768505 | 0.89142299  |
| C       | 1.45755005  | -2.74907708 | -0.97174400 |
| C       | 3.72318411  | -2.64266801 | 0.64644599  |
| H       | 2.70981097  | -1.07635903 | 1.71762502  |
| C       | 2.52236009  | -3.61333799 | -1.20998800 |
| H       | 0.59153599  | -2.76929903 | -1.62732506 |
| C       | 3.66095304  | -3.56469989 | -0.40026900 |
| H       | 4.60469294  | -2.59636998 | 1.28007305  |
| H       | 2.47019005  | -4.31681013 | -2.03672791 |
| H       | 4.49489689  | -4.23496389 | -0.59003299 |
| C       | -3.31618690 | -0.15690300 | 0.00530600  |
| C       | -3.77698207 | -0.94448501 | -1.06401205 |
| C       | -4.26211596 | 0.51419801  | 0.80050099  |
| C       | -5.14050817 | -1.04664505 | -1.33814001 |
| H       | -3.06429505 | -1.45949996 | -1.70188105 |
| C       | -5.62389421 | 0.40720701  | 0.52911502  |
| H       | -3.92301798 | 1.09861004  | 1.65079200  |
| C       | -6.06876421 | -0.37245601 | -0.54250097 |
| H       | -5.47725677 | -1.65276694 | -2.17474389 |
| H       | -6.34053421 | 0.92525798  | 1.16048396  |
| H       | -7.13149500 | -0.45761400 | -0.75172299 |
| P       | 0.49160799  | 0.78196001  | 1.04097605  |
| S       | 1.17426705  | 1.00406897  | 2.88112712  |

|                | 1       | 2       | 3       |
|----------------|---------|---------|---------|
|                | A       | A       | A       |
| Frequencies -- | 22.5820 | 26.0088 | 28.4931 |

|                |        |        |        |
|----------------|--------|--------|--------|
| Red. masses -- | 3.7843 | 4.7370 | 4.5216 |
| Frc consts --  | 0.0011 | 0.0019 | 0.0022 |
| IR Inten --    | 0.0806 | 0.3962 | 0.1782 |

|                                              |              |
|----------------------------------------------|--------------|
| Sum of electronic and zero-point Energies=   | -1587.821055 |
| Sum of electronic and thermal Energies=      | -1587.800926 |
| Sum of electronic and thermal Enthalpies=    | -1587.799982 |
| Sum of electronic and thermal Free Energies= | -1587.872953 |

HF = -1588.14432363

**4b**

```

=====
Element          X          Y          Z
=====
C          -1.15084803   -0.90724301    1.03486097
C          -1.90503895   -0.14442800    0.21264599
C          -1.12784898    0.98467398   -0.38665700
C           0.17460801    1.11048496   -0.04413700
H          -1.48134696   -1.77397203    1.59619904
H          -1.61916006    1.67496502   -1.07211900
P           0.55513197   -0.26039499    1.11278605
C           1.58068597   -1.43243599    0.13028599
C           2.77429795   -1.93105805    0.65899003
C           1.17943001   -1.80056405   -1.16316903
C           3.56780100   -2.79129410   -0.10466000
H           3.07650805   -1.63807905    1.66057205
C           1.97415197   -2.65847993   -1.92093205
H           0.25322101   -1.40969503   -1.57591295
C           3.17108297   -3.15362191   -1.39240897
H           4.49656677   -3.17496610    0.30865401
H           1.66274405   -2.93984199   -2.92335391
H           3.79109001   -3.82032895   -1.98574305
C           1.77943206    3.57582307    0.82364702
C           2.98914409    1.52597499   -1.15792000
C           0.63437301    3.34570599   -2.06309199
H           0.88329297    4.13167000    1.12301099
H           2.12069511    3.00309396    1.69300401
H           2.55711794    4.30192709    0.55560499
H           2.79056406    0.79870403   -1.95323896
H           3.73030806    2.24491191   -1.52815795
H           3.43850207    0.97981501   -0.32084301
H           1.31533396    4.12295914   -2.43068600
H           0.41163099    2.67434812   -2.90092611
H           -0.29936299    3.84001493   -1.76853597
C           -3.89728904   -0.75372702   -2.02324390
C           -4.32872677   -1.93344200    0.82284701
C           -4.69693422    1.11582398    0.31171000
H           -3.50690293    0.08941100   -2.60609198
H           -3.34424090   -1.65152705   -2.32366395
H           -4.94708109   -0.89557898   -2.30774808
H           -4.21742201   -1.76864398    1.90094495
H           -5.38843822   -2.13390398    0.62463701
H           -3.76545596   -2.83685994    0.56074601
H           -5.76236582    1.00607002    0.07502300
H           -4.60940886    1.32194304    1.38466501
H           -4.32593489    1.99589396   -0.22734800
Si           1.41129601    2.41114092   -0.61315203
Si           -3.73296595   -0.43965101   -0.16404200
S           1.28787696    0.20309800    2.88735199
=====

```

|                |         |         |         |
|----------------|---------|---------|---------|
|                | 1       | 2       | 3       |
|                | A       | A       | A       |
| Frequencies -- | 19.5107 | 21.6817 | 28.6386 |
| Red. masses -- | 3.0371  | 3.0816  | 4.6537  |
| Frc consts --  | 0.0007  | 0.0009  | 0.0022  |
| IR Inten --    | 0.0641  | 0.0895  | 0.4065  |

|                                              |              |
|----------------------------------------------|--------------|
| Sum of electronic and zero-point Energies=   | -1943.029063 |
| Sum of electronic and thermal Energies=      | -1943.002277 |
| Sum of electronic and thermal Enthalpies=    | -1943.001332 |
| Sum of electronic and thermal Free Energies= | -1943.087494 |

HF = -1943.39374981

#### 4c

```
=====
Element          X           Y           Z
=====
C          -1.06270695    -0.88637203    1.09356296
C          -1.95878506    -0.43397900    0.19338500
C          -1.46954894     0.73995697   -0.58543801
C          -0.23768499     1.20361495   -0.29602799
H          -1.18675303    -1.71585500    1.77649498
H          -2.10277796     1.19087398   -1.34302998
P           0.45030200     0.10947600    1.02905798
C           1.68587601    -0.95510399    0.17144200
C           2.96388197    -1.11985397    0.71171898
C           1.34727502    -1.59203303   -1.03240001
C           3.90277410    -1.91476500    0.04898800
H           3.21609902    -0.62234199    1.64396000
C           2.28749490    -2.38203692   -1.69087994
H           0.35375699    -1.46350098   -1.45328295
C           3.56783605    -2.54353404   -1.15076399
H           4.89579201    -2.03959608    0.47208601
H           2.02358103    -2.87147403   -2.62459898
H           4.30019999    -3.15931511   -1.66596103
C           0.34098101    3.59533405    0.09616300
C           1.96822095     2.10344005   -1.11841595
C          -0.16719700     2.80250192   -2.23841095
H          -0.71253502     3.84881496    0.25910199
H           0.78671497     3.35353088    1.06476498
H           0.84924001     4.47714901   -0.31377700
H           2.10613108     1.25764298   -1.80032694
H           2.46227503     2.98024988   -1.55268002
H           2.47543311     1.86706197   -0.17732300
H           0.37614900     3.64904308   -2.67301798
H          -0.13384300     1.97177804   -2.95292211
H          -1.21167397     3.11174393   -2.11759496
C          -3.42703295    -1.47235501   -1.53880095
C          -3.64743590    -2.19605303    0.85487998
C          -4.40047503     0.10245500    0.18249300
H          -3.24185801    -0.65290302   -2.24177289
H          -2.69203305    -2.26118207   -1.73642302
H          -4.42464018    -1.87449002   -1.75123203
H          -3.60983801    -1.90394497    1.91016698
H          -4.65061617    -2.58564806    0.64902103
H          -2.93198109    -3.01135111    0.69872397
H          -5.40648079    -0.28939900   -0.00882100
H          -4.35973692     0.45230201    1.21978295
H          -4.25081015     0.96797401   -0.47182500
C           0.47092700     2.40895796   -0.89202201
C          -3.34660506    -1.00233603   -0.06687900
S           1.08805704     0.93335497    2.70619011
=====
```

|                | 1       | 2       | 3       |
|----------------|---------|---------|---------|
|                | A       | A       | A       |
| Frequencies -- | 33.7211 | 36.8282 | 39.3973 |
| Red. masses -- | 4.2309  | 3.3342  | 2.9938  |
| Frc consts --  | 0.0028  | 0.0027  | 0.0027  |
| IR Inten --    | 0.3793  | 0.1462  | 0.1123  |

Sum of electronic and zero-point Energies= -1440.172350  
Sum of electronic and thermal Energies= -1440.150845  
Sum of electronic and thermal Enthalpies= -1440.149900  
Sum of electronic and thermal Free Energies= -1440.222235

HF = -1440.56044073

#### 4d

```
=====
Element          X           Y           Z
=====
C          -1.28135204     1.19661200    0.80483001
=====
```

|   |             |             |             |
|---|-------------|-------------|-------------|
| C | -1.76899004 | 0.01568000  | 0.35124499  |
| C | -0.72251499 | -1.00932300 | 0.11930900  |
| C | 0.54970402  | -0.65260398 | 0.41158399  |
| H | -1.85949600 | 2.08069491  | 1.04110205  |
| H | -0.99271500 | -2.00507307 | -0.22075699 |
| C | 1.29234397  | 2.06119704  | -0.31297800 |
| C | 2.33722901  | 2.94416404  | -0.02590300 |
| C | 0.85272098  | 1.89893198  | -1.63601601 |
| C | 2.94193602  | 3.66358089  | -1.05969000 |
| H | 2.66866994  | 3.06282091  | 1.00171900  |
| C | 1.45893300  | 2.61916804  | -2.66280890 |
| H | 0.04121300  | 1.21131504  | -1.85868800 |
| C | 2.50499010  | 3.50229812  | -2.37505889 |
| H | 3.75403094  | 4.34921885  | -0.83424997 |
| H | 1.11738205  | 2.49290705  | -3.68655705 |
| H | 2.97711992  | 4.06268120  | -3.17751288 |
| C | 1.76541400  | -1.44393396 | 0.20416901  |
| C | 2.92272806  | -1.23177898 | 0.97897297  |
| C | 1.80565202  | -2.43259907 | -0.79978400 |
| C | 4.07184505  | -1.99059403 | 0.77210802  |
| H | 2.91469693  | -0.48084301 | 1.76182103  |
| C | 2.94657612  | -3.19904304 | -1.01280904 |
| H | 0.93993598  | -2.58469892 | -1.43733597 |
| C | 4.06593323  | -2.96559405 | -0.21890301 |
| H | 4.96533012  | -1.83932102 | 1.36842895  |
| H | 2.98896694  | -3.95731997 | -1.78750205 |
| C | -3.19473195 | -0.27528000 | 0.10987200  |
| C | -3.58942509 | -1.16742802 | -0.90306902 |
| C | -4.19526815 | 0.34507599  | 0.88064200  |
| C | -4.93574905 | -1.42489100 | -1.15298402 |
| H | -2.83947110 | -1.64850605 | -1.52358401 |
| C | -5.54361010 | 0.09430900  | 0.64627302  |
| H | -3.90944409 | 1.01027298  | 1.68955600  |
| C | -5.89355707 | -0.78827798 | -0.37173599 |
| H | -5.25100899 | -2.10365200 | -1.93820095 |
| H | -6.32216311 | 0.55841398  | 1.24223900  |
| P | 0.50902301  | 1.09223199  | 1.03437996  |
| S | 1.18803406  | 1.46786404  | 2.85067701  |
| F | 5.17683601  | -3.70010209 | -0.42577901 |
| F | -7.19703102 | -1.03725696 | -0.60206300 |

=====

|                | 1       | 2       | 3       |
|----------------|---------|---------|---------|
|                | A       | A       | A       |
| Frequencies -- | 21.6926 | 24.3093 | 26.3740 |
| Red. masses -- | 4.0689  | 5.5211  | 4.3641  |
| Frc consts --  | 0.0011  | 0.0019  | 0.0018  |
| IR Inten --    | 0.0988  | 0.4999  | 0.0506  |

Sum of electronic and zero-point Energies= -1786.304088  
Sum of electronic and thermal Energies= -1786.282253  
Sum of electronic and thermal Enthalpies= -1786.281309  
Sum of electronic and thermal Free Energies= -1786.358526

HF = -1786.61087673

## 6a

| Element | X           | Y           | Z           |
|---------|-------------|-------------|-------------|
| C       | -1.33053195 | -1.13660300 | -0.29100001 |
| C       | -1.98643398 | 0.03554300  | -0.10246700 |
| C       | -1.09228206 | 1.21667504  | -0.08132600 |
| C       | 0.22632800  | 0.98347199  | -0.28095701 |
| H       | -1.77807701 | -2.12047100 | -0.34654400 |
| H       | -1.50090098 | 2.21563911  | 0.04109700  |
| C       | 1.30598199  | -1.40160406 | 0.98628998  |
| C       | 2.46144390  | -2.18124795 | 0.88802898  |
| C       | 0.81333297  | -1.02813494 | 2.24630809  |
| C       | 3.12427497  | -2.58775592 | 2.04871202  |
| H       | 2.83144903  | -2.46368504 | -0.09377100 |
| C       | 1.47802305  | -1.43719101 | 3.40019798  |
| H       | -0.08397200 | -0.41971999 | 2.32085991  |



|    |             |             |             |
|----|-------------|-------------|-------------|
| C  | 2.63491511  | -2.21751690 | 3.30197501  |
| H  | 4.02277899  | -3.19363999 | 1.97056496  |
| H  | 1.09587097  | -1.14803505 | 4.37542391  |
| H  | 3.15240788  | -2.53482008 | 4.20336294  |
| C  | 1.31894505  | 1.96036696  | -0.22591799 |
| C  | 2.51648808  | 1.76686502  | -0.93980497 |
| C  | 1.19138598  | 3.11623001  | 0.56992799  |
| C  | 3.54116797  | 2.70928693  | -0.87038201 |
| H  | 2.63207507  | 0.88670999  | -1.56398499 |
| C  | 2.21588492  | 4.05655813  | 0.63240999  |
| H  | 0.29192799  | 3.26075506  | 1.16177201  |
| C  | 3.39653802  | 3.85756111  | -0.08916000 |
| H  | 4.45577478  | 2.54513788  | -1.43365395 |
| H  | 2.09915400  | 4.93925714  | 1.25556004  |
| H  | 4.19900417  | 4.58825684  | -0.03550500 |
| C  | -3.44740009 | 0.17160800  | 0.05594100  |
| C  | -3.99321508 | 1.18594599  | 0.86174703  |
| C  | -4.32484484 | -0.72023100 | -0.58610702 |
| C  | -5.37296486 | 1.29654896  | 1.03120697  |
| H  | -3.33451891 | 1.87677801  | 1.38034594  |
| C  | -5.70287609 | -0.60569000 | -0.42019400 |
| H  | -3.91927004 | -1.48738301 | -1.23920095 |
| C  | -6.23274279 | 0.40229401  | 0.39052299  |
| H  | -5.77602720 | 2.08152699  | 1.66528404  |
| H  | -6.36563778 | -1.29804206 | -0.93203902 |
| H  | -7.30803299 | 0.49265501  | 0.51704901  |
| P  | 0.43563700  | -0.83854198 | -0.52950799 |
| Se | 1.24420404  | -1.53825498 | -2.36646199 |

=====

|                | 1       | 2       | 3       |
|----------------|---------|---------|---------|
|                | A       | A       | A       |
| Frequencies -- | 23.3945 | 25.5277 | 29.0279 |
| Red. masses -- | 3.8115  | 6.1785  | 3.9073  |
| Frc consts --  | 0.0012  | 0.0024  | 0.0019  |
| IR Inten --    | 0.0727  | 0.4053  | 0.0541  |

Sum of electronic and zero-point Energies= -3588.564784  
Sum of electronic and thermal Energies= -3588.544333  
Sum of electronic and thermal Enthalpies= -3588.543389  
Sum of electronic and thermal Free Energies= -3588.617648

HF = -3588.88737204

## 6b

| Element | X           | Y           | Z           |
|---------|-------------|-------------|-------------|
| C       | -1.20858204 | -0.83846599 | 0.93999898  |
| C       | -2.03017092 | -0.14119899 | 0.12272000  |
| C       | -1.30245805 | 0.90819800  | -0.65318000 |
| C       | 0.02904500  | 1.03864801  | -0.44888401 |
| H       | -1.49229205 | -1.63898504 | 1.61369205  |
| H       | -1.84946096 | 1.54371905  | -1.34930801 |
| P       | 0.50196499  | -0.22036000 | 0.79450297  |
| C       | 1.42622304  | -1.50354600 | -0.15054300 |
| C       | 2.64837694  | -1.98577201 | 0.32445800  |
| C       | 0.91019499  | -1.97559297 | -1.36733103 |
| C       | 3.35632801  | -2.93512702 | -0.41715401 |
| H       | 3.03901291  | -1.60931695 | 1.26607502  |
| C       | 1.62075806  | -2.92153811 | -2.10366511 |
| H       | -0.03845600 | -1.59699905 | -1.73833799 |
| C       | 2.84628391  | -3.40144897 | -1.62936902 |
| H       | 4.30783796  | -3.30633998 | -0.04640800 |
| H       | 1.22135496  | -3.28335309 | -3.04735303 |
| H       | 3.40034199  | -4.13714790 | -2.20619297 |
| C       | 1.59984505  | 3.62920499  | 0.02083400  |
| C       | 2.80466390  | 1.34467304  | -1.68967295 |
| C       | 0.38608399  | 2.97722006  | -2.77159190 |
| H       | 0.69996703  | 4.20799398  | 0.25978100  |
| H       | 1.96832204  | 3.18531299  | 0.95225197  |
| H       | 2.35913801  | 4.32221794  | -0.36266801 |
| H       | 2.60278797  | 0.50677001  | -2.36644197 |

|    |             |             |             |
|----|-------------|-------------|-------------|
| H  | 3.51898098  | 2.01714110  | -2.18036699 |
| H  | 3.28760409  | 0.93607801  | -0.79474199 |
| H  | 1.03710198  | 3.71116400  | -3.26200700 |
| H  | 0.15909301  | 2.19143891  | -3.50179505 |
| H  | -0.55231899 | 3.48709297  | -2.52145910 |
| C  | -4.24484921 | -0.91377503 | -1.83671498 |
| C  | -4.40320110 | -1.80992496 | 1.13816500  |
| C  | -4.78129816 | 1.18474996  | 0.37601700  |
| H  | -3.90202498 | -0.13942300 | -2.53374410 |
| H  | -3.73826504 | -1.84928298 | -2.10191607 |
| H  | -5.31988478 | -1.05593896 | -2.00168490 |
| H  | -4.18022299 | -1.54751503 | 2.17897797  |
| H  | -5.48037577 | -2.00263000 | 1.06728601  |
| H  | -3.88267708 | -2.74719906 | 0.90856999  |
| H  | -5.86644697 | 1.07758904  | 0.25684801  |
| H  | -4.58399487 | 1.48819995  | 1.41060805  |
| H  | -4.45436716 | 2.00193906  | -0.27823099 |
| Si | 1.22304296  | 2.26869607  | -1.22974503 |
| Si | -3.89028907 | -0.42966199 | -0.04177300 |
| Se | 1.45905197  | 0.46642900  | 2.56287503  |

|                | 1       | 2       | 3       |
|----------------|---------|---------|---------|
|                | A       | A       | A       |
| Frequencies -- | 17.4286 | 21.6667 | 27.1667 |
| Red. masses -- | 3.0253  | 3.2255  | 4.6868  |
| Frc consts --  | 0.0005  | 0.0009  | 0.0020  |
| IR Inten --    | 0.0468  | 0.1126  | 0.3128  |

Sum of electronic and zero-point Energies= -3943.773140  
Sum of electronic and thermal Energies= -3943.746033  
Sum of electronic and thermal Enthalpies= -3943.745089  
Sum of electronic and thermal Free Energies= -3943.832758

HF = -3944.13713086

## 6c

| Element | X           | Y           | Z           |
|---------|-------------|-------------|-------------|
| C       | -1.13578498 | -0.55997598 | 1.18253899  |
| C       | -2.09895205 | -0.35098001 | 0.26135099  |
| C       | -1.63099694 | 0.44532800  | -0.90755701 |
| C       | -0.34841701 | 0.86134702  | -0.89872402 |
| H       | -1.23077905 | -1.09721196 | 2.11626410  |
| H       | -2.31663799 | 0.67858100  | -1.71615005 |
| P       | 0.41438499  | 0.21569601  | 0.65738100  |
| C       | 1.49313796  | -1.17916906 | 0.11843600  |
| C       | 2.80740595  | -1.27477705 | 0.58200097  |
| C       | 0.99097002  | -2.14219499 | -0.77041900 |
| C       | 3.62019396  | -2.32824492 | 0.15538099  |
| H       | 3.18509007  | -0.52245098 | 1.26917696  |
| C       | 1.80621803  | -3.18961692 | -1.19464505 |
| H       | -0.03098800 | -2.06670094 | -1.13176405 |
| C       | 3.12326503  | -3.28325105 | -0.73232698 |
| H       | 4.64226007  | -2.39902806 | 0.51737797  |
| H       | 1.41630697  | -3.93238211 | -1.88550997 |
| H       | 3.75801396  | -4.10026407 | -1.06483305 |
| C       | 0.32907799  | 3.20027494  | -1.42205405 |
| C       | 1.82658195  | 1.29173696  | -2.10193992 |
| C       | -0.35746700 | 1.65294194  | -3.28694010 |
| H       | -0.70336300 | 3.55036402  | -1.31097198 |
| H       | 0.82706499  | 3.29343009  | -0.45301700 |
| H       | 0.83909100  | 3.85041189  | -2.14404702 |
| H       | 1.89422297  | 0.25349501  | -2.44373703 |
| H       | 2.31717992  | 1.93118894  | -2.84476399 |
| H       | 2.38525891  | 1.38034904  | -1.16434002 |
| H       | 0.18270200  | 2.25593805  | -4.02549314 |
| H       | -0.39960900 | 0.62044901  | -3.65268612 |
| H       | -1.38066995 | 2.04187107  | -3.23369002 |
| C       | -3.81368589 | -1.76236200 | -0.87943399 |
| C       | -3.80360699 | -1.62483203 | 1.62725496  |
| C       | -4.49002123 | 0.37946799  | 0.28052101  |

|    |             |             |             |
|----|-------------|-------------|-------------|
| H  | -3.66037011 | -1.24454701 | -1.83251202 |
| H  | -3.15444493 | -2.63786793 | -0.85949701 |
| H  | -4.85128403 | -2.11574793 | -0.85537201 |
| H  | -3.63022304 | -1.00298297 | 2.51247096  |
| H  | -4.84477091 | -1.96510196 | 1.65365601  |
| H  | -3.15953112 | -2.50871301 | 1.69709599  |
| H  | -5.53278780 | 0.04317600  | 0.32275400  |
| H  | -4.31050491 | 1.04912198  | 1.12867403  |
| H  | -4.36469793 | 0.95954102  | -0.64006102 |
| C  | 0.35755500  | 1.73447704  | -1.92395699 |
| C  | -3.53891206 | -0.83963197 | 0.33171099  |
| Se | 1.32612705  | 1.59607100  | 1.98979604  |

=====

|                | 1       | 2       | 3       |
|----------------|---------|---------|---------|
|                | A       | A       | A       |
| Frequencies -- | 31.9650 | 36.2136 | 42.7590 |
| Red. masses -- | 4.3296  | 3.5761  | 2.8251  |
| Frc consts --  | 0.0026  | 0.0028  | 0.0030  |
| IR Inten --    | 0.2787  | 0.1532  | 0.0617  |

|                                              |              |
|----------------------------------------------|--------------|
| Sum of electronic and zero-point Energies=   | -3440.916016 |
| Sum of electronic and thermal Energies=      | -3440.894177 |
| Sum of electronic and thermal Enthalpies=    | -3440.893233 |
| Sum of electronic and thermal Free Energies= | -3440.966958 |

HF = -3441.30338031
